# Supplementary material for: Consensus statement: loneliness in older adults, the 21st century social determinant of health?
Source: PubMed Central journal article supplement — BMJ Open. 2020 Aug 11;10(8):e034967. doi: 10.1136/bmjopen-2019-034967 (PMC7422633; doi:10.1136/bmjopen-2019-034967), 2020-08-11
Supplement: bmjopen-2019-034967.draft_revisions.pdf [file bmjopen-2019-034967.draft_revisions.pdf]

# BMJ Open

BMJ Open is committed to open peer review. As part of this commitment we make the peer review history of every article we publish publicly available.

When an article is published we post the peer reviewers' comments and the authors' responses online. We also post the versions of the paper that were used during peer review. These are the versions that the peer review comments apply to.

The versions of the paper that follow are the versions that were submitted during the peer review process. They are not the versions of record or the final published versions. They should not be cited or distributed as the published version of this manuscript.

BMJ Open is an open access journal and the full, final, typeset and author-corrected version of record of the manuscript is available on our site with no access controls, subscription charges or pay-per-view fees (<http://bmjopen.bmj.com>).

If you have any questions on BMJ Open's open peer review process please email [info.bmjopen@bmj.com](mailto:info.bmjopen@bmj.com)

# BMJ Open

## Consensus Statement - Loneliness in older adults, the 21st Century Social Determinant of Health?

|                                 |                                                                                                                                                                                                                                                                                                                                                                                                                                                                                                                                                                                                                                                                                                                                                                                                                                                                                                                                                                                                                                                                                                              |
|---------------------------------|--------------------------------------------------------------------------------------------------------------------------------------------------------------------------------------------------------------------------------------------------------------------------------------------------------------------------------------------------------------------------------------------------------------------------------------------------------------------------------------------------------------------------------------------------------------------------------------------------------------------------------------------------------------------------------------------------------------------------------------------------------------------------------------------------------------------------------------------------------------------------------------------------------------------------------------------------------------------------------------------------------------------------------------------------------------------------------------------------------------|
| Journal:                        | <i>BMJ Open</i>                                                                                                                                                                                                                                                                                                                                                                                                                                                                                                                                                                                                                                                                                                                                                                                                                                                                                                                                                                                                                                                                                              |
| Manuscript ID                   | bmjopen-2019-034967.R1                                                                                                                                                                                                                                                                                                                                                                                                                                                                                                                                                                                                                                                                                                                                                                                                                                                                                                                                                                                                                                                                                       |
| Article Type:                   | Communication                                                                                                                                                                                                                                                                                                                                                                                                                                                                                                                                                                                                                                                                                                                                                                                                                                                                                                                                                                                                                                                                                                |
| Date Submitted by the Author:   | 06-Dec-2019                                                                                                                                                                                                                                                                                                                                                                                                                                                                                                                                                                                                                                                                                                                                                                                                                                                                                                                                                                                                                                                                                                  |
| Complete List of Authors:       | <p>Prohaska, Thomas ; George Mason University<br/>         Burholt, Vanessa; The University of Auckland - City Campus; Swansea University<br/>         Burns, Annette; Institute of Public Health in Ireland; University of Ulster Faculty of Life and Health Sciences<br/>         Golden , Jeannette; Saint James's Hospital, Mercer's Institute for Successful Ageing<br/>         Hawkley, Louise; NORC at the University of Chicago, Academic Research Centers<br/>         Lawlor, Brian; Trinity College, The Global Brain Health Institute<br/>         Leavey, Gerard; University of Ulster, Psychology<br/>         Lubben, Jim; Boston College, Social Work<br/>         O'Sullivan, Roger; Institute of Public Health in Ireland; University of Ulster Faculty of Life and Health Sciences,<br/>         Perissinotto, Carla; University of California San Francisco School of Medicine<br/>         van Tilburg, Theo; University Amsterdam<br/>         Tully, Mark; University of Ulster<br/>         Victor, Christina; Brunel University<br/>         Fried, Linda; Columbia University</p> |
| <b>Primary Subject Heading</b>: | Public health                                                                                                                                                                                                                                                                                                                                                                                                                                                                                                                                                                                                                                                                                                                                                                                                                                                                                                                                                                                                                                                                                                |
| Secondary Subject Heading:      | Geriatric medicine                                                                                                                                                                                                                                                                                                                                                                                                                                                                                                                                                                                                                                                                                                                                                                                                                                                                                                                                                                                                                                                                                           |
| Keywords:                       | GERIATRIC MEDICINE, PUBLIC HEALTH, Old age psychiatry < PSYCHIATRY                                                                                                                                                                                                                                                                                                                                                                                                                                                                                                                                                                                                                                                                                                                                                                                                                                                                                                                                                                                                                                           |
|                                 |                                                                                                                                                                                                                                                                                                                                                                                                                                                                                                                                                                                                                                                                                                                                                                                                                                                                                                                                                                                                                                                                                                              |

SCHOLARONE™  
Manuscripts

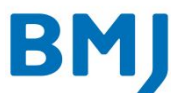

I, the Submitting Author has the right to grant and does grant on behalf of all authors of the Work (as defined in the below author licence), an exclusive licence and/or a non-exclusive licence for contributions from authors who are: i) UK Crown employees; ii) where BMJ has agreed a CC-BY licence shall apply, and/or iii) in accordance with the terms applicable for US Federal Government officers or employees acting as part of their official duties; on a worldwide, perpetual, irrevocable, royalty-free basis to BMJ Publishing Group Ltd ("BMJ") its licensees and where the relevant Journal is co-owned by BMJ to the co-owners of the Journal, to publish the Work in BMJ Open and any other BMJ products and to exploit all rights, as set out in our [licence](#).

The Submitting Author accepts and understands that any supply made under these terms is made by BMJ to the Submitting Author unless you are acting as an employee on behalf of your employer or a postgraduate student of an affiliated institution which is paying any applicable article publishing charge ("APC") for Open Access articles. Where the Submitting Author wishes to make the Work available on an Open Access basis (and intends to pay the relevant APC), the terms of reuse of such Open Access shall be governed by a Creative Commons licence – details of these licences and which [Creative Commons](#) licence will apply to this Work are set out in our licence referred to above.

Other than as permitted in any relevant BMJ Author's Self Archiving Policies, I confirm this Work has not been accepted for publication elsewhere, is not being considered for publication elsewhere and does not duplicate material already published. I confirm all authors consent to publication of this Work and authorise the granting of this licence.

## Loneliness – Consensus Statement

**Title:** *Consensus Statement - Loneliness in Older Adults, the 21<sup>st</sup> Century Social Determinant of Health?*

\*Corresponding author

Prof Roger O'Sullivan  
Institute of Public Health in Ireland  
Forestview  
Belfast  
BT8 7AR  
T: 028 90 64 84 94  
E: roger.osullivan@publichealth.ie

### Co-Authors

- Prof Thomas Prohaska, College of Health and Human Services, George Mason University, USA
- Prof Vanessa Burholt, School of Nursing/School of Population Health, University of Auckland & Swansea University, New Zealand and UK
- Dr Annette Burns, Institute of Public Health in Ireland & Bamford Centre for Mental Health and Well Being, Ulster University, Ireland & UK
- Dr Jeannette Golden, Mercer's Institute for Successful Ageing, St James Hospital Dublin, Ireland
- Dr Louise Hawkey, NORC, University of Chicago, USA
- Prof Brian Lawlor, Global Brain Health Institute, Trinity College Dublin, Ireland
- Prof Gerry Leavey, Bamford Centre for Mental Health and Well Being, Ulster University, UK
- Prof Jim Lubben, School of Social Work, Boston College, University of California, Los Angeles Luskin School of Public Affairs, USA
- Prof Roger O'Sullivan, Institute of Public Health in Ireland & Bamford Centre for Mental Health and Well Being, Ulster University, Ireland & UK\*
- Dr Carla Perissinotto, Department of Medicine, University of California San Francisco, USA
- Prof Theo van Tilburg, Department of Sociology, Faculty of Social Sciences, Vrije Universiteit Amsterdam, Netherland
- Prof Mark Tully, School of Health Sciences, Ulster University, UK
- Prof Christina Victor, College of Health and Life Sciences, Brunel University London, UK
- Prof Linda Fried, Mailman School of Public Health, Columbia University, USA

Keywords: Loneliness; Health and Wellbeing; Interventions; Ageing

Word count: 2557

## Loneliness – Consensus Statement

### Abstract

#### **Consensus Statement - Loneliness in Older Adults, the 21<sup>st</sup> Century Social Determinant of Health?**

### Objectives

The purpose of this consensus statement is to determine the state of the field of loneliness among older people, highlighting key issues for researchers, policymakers and those designing services and interventions.

### Methods

In December 2018, an international meeting on loneliness was held in Belfast with leaders from across the USA and Europe. An analysis of the content, conclusions and discussion of each presentation was conducted to determine the frequency and consistency of statements.

### Results

This meeting resulted in agreement to produce a consensus statement on key issues including definitions of loneliness, measurement, causes/antecedents, consequences and interventions.

### Discussion

There has been an exponential growth in research on loneliness among older adults. However differing measurements and definitions of loneliness means the incidence and prevalence, associated risk factors and health consequences are often conflicting or confusing especially for those developing policy and services. This consensus statement aims to help address these challenges.

## Loneliness – Consensus Statement

### **Consensus Statement - Loneliness in Older Adults, the 21<sup>st</sup> Century Social Determinant of Health?**

In December 2018, a group of international researchers, practitioners and policymakers working in the area of ageing and older people met as part of a three-day symposium held in Belfast, Northern Ireland to discuss loneliness, its impact and appropriate interventions [1-15]. It is encouraging that there has been an exponential growth in research on loneliness and social isolation among older adults of late, in recognition of the significance of loneliness as an adverse experience in older age. However, limitations persist in the evidence base, in relation to impacts, risk factors, assessment and especially interventions. The objective of the Belfast meeting was to determine the state of the field of loneliness among older people, highlighting best practices, evidence and key research gaps. The following consensus statement emerged from these discussions in relation to the current status of policy, practice and especially research on loneliness.

#### **Context**

It seems there have never been so many ways to connect with people, yet the fear of loneliness is increasingly capturing public attention, driving the issue further up policy agendas across the world [16]. For example, in the UK, 2018 saw the launch of a loneliness strategy [17] and a loneliness minister appointed. In the US, the National Academies of Sciences, Engineering, and Medicine have formed a committee to examine how social isolation and loneliness impact health outcomes in older adults. The AARP in the US and the Campaign to End Loneliness in the UK have established awareness raising work and visibility in this area. Campaigns are an important necessary step to raise awareness to effectively address the stigma of loneliness but are not sufficient especially for the development of effective interventions.

With growing concern about rates and consequences of loneliness in civic society, there is also an increasing body of research on loneliness and social isolation among older adults. However, there are significant gaps in our understanding of the 'true rates' of loneliness within and across countries,

## Loneliness – Consensus Statement

1  
2  
3 the drivers of loneliness in different populations and sub-groups, its impact on health and well-  
4 being, and a lack of high quality evidence on effective solutions. In summary, evidence to support  
5 appropriate action in addressing loneliness is urgently needed. However a number of building blocks  
6 are required in relation to definitions, measurement, causes, consequences and ultimately effective  
7 interventions [18].  
8  
9  
10  
11  
12  
13  
14

### Definitions

15  
16  
17  
18 A formal definition of loneliness remains elusive, but it is acknowledged as distinct from social  
19 isolation and social exclusion [10]. Loneliness is a subjective negative experience that results from  
20 inadequate meaningful connections, where “inadequate” refers to the discrepancy or unmet need  
21 between an individual’s preferred and actual experience [3,19]. Loneliness has been described in a  
22 range of different domains and experienced as a sense of inadequate social connection to:  
23  
24  
25  
26  
27  
28

- 29 a) an intimate other person,
- 30
- 31 b) family and friends, and
- 32
- 33 c) community life, collective identity and roles bringing connections to the broader society  
34 with meaning and purpose  
35  
36  
37

38 Different domains of loneliness are reflected in research that distinguishes between emotional and  
39 social loneliness, where emotional loneliness is characterized by the absence of an intimate  
40 connection and social loneliness is characterized by the absence of contact and engagement with a  
41 broader network of friends, neighbours, and colleagues [20-21]. Others have distinguished between  
42 loneliness that is intimate, relational (marked by the perceived lack of close friends/confidants), and  
43 collective (characterized by a perceived lack of a sense of belonging or group identity)[22]. Still  
44  
45  
46  
47  
48  
49  
50  
51  
52 others discuss existential loneliness [23].  
53  
54  
55

56 To date, the range of definitions of loneliness has been useful for drawing attention to the issue but  
57 not sufficient for advancing the field to explain, for example, the intensity, frequency and duration of  
58  
59  
60

## Loneliness – Consensus Statement

loneliness. Loneliness can be acute (i.e., transient) or chronic (i.e., enduring), and it can be mild to severe in its intensity. Moreover, it can stem from a variety of causes, and each cause may require a unique “solution”. Researchers, policymakers and practitioners all tend to define and discuss loneliness differently which can create confusion as to what is meant as well as what actions to take for policy, services and society. To deliver effective policy and practice requires a more nuanced understanding of the complexity of loneliness (e.g., the different types, root causes of, and ways of addressing loneliness) which, while not considered a medical condition, can have an impact on health.

Further theoretical and empirical work is needed to adequately conceptualise the complexity of loneliness, and to distinguish its various domains and types and frequencies. Unfortunately, the focus has tended to be on social loneliness with relative neglect of other types of loneliness. In particular, there is a need to develop a unified language and definition(s) to facilitate the discussion of loneliness, its evidence, and mechanisms for its effects, and to develop theoretical frameworks that situate loneliness and its antecedents and consequences in a global social context. Doing so would also permit accurate comparisons of global loneliness trends, and could accelerate the development and dissemination of interventions across countries.

### **Measurement**

Directly connected to definitions, standardised and validated measurement of loneliness is crucial. Currently, different studies use a mixture of scales (which assess frequency only) and single-item measures, while some reviews have further combined these with aspects such as living alone and marital status under the umbrella term of isolation/loneliness, leading to an ambiguous and unreliable evidence base.

The most widely-used validated loneliness scales are:



## Loneliness – Consensus Statement

- UCLA Loneliness Scale [24]; Revised UCLA Loneliness Scale, version 3 [25]; UCLA 3-item Loneliness Scale [26]
- the De Jong Gierveld 11-item or 6-item Loneliness Scale [20,27-28].

The UCLA Loneliness scale is intended to assess loneliness as a unitary construct; dimensions of the loneliness experience have been identified in factor analyses but they are subsumed in a higher level loneliness construct. In contrast, the De Jong Gierveld scale assesses overall as well as emotional and social loneliness through its subscales. Though less widely used, the Social and Emotional Loneliness Scale for Adults (SELSA) [21] also distinguishes between social and emotional loneliness and further distinguishes two domains of emotional loneliness - family and romantic. In addition to the original 37-item measure, a revised 15-item version is also used [29].

While not always co-occurring, there is an association and /overlap between social isolation and loneliness [1,10]. Common measures of social isolation include the six-item Lubben Social Network Scale (LSNS-6) [30-31] and the four-item Berkman-Syme Social Network Index (SNI) [32-33]. To date there has been no consensus statement on social isolation in terms of definitions, measurement and scales however many of the points made in the current paper in relation to loneliness are also relevant [34].

The symposium participants did not explore or compare measures or their relative utility. However, it was recognised that a common set of validated measures of loneliness is needed in order to examine findings across research and interventions. The systematic inclusion of a harmonised set of covariates, demographic factors and antecedent or predictor measures would also facilitate meta-analyses and evidence-based reviews. A selection of scales currently used to assess both loneliness and isolation is available here (<https://www.publichealth.ie/ILINK>).

A consensus was reached that validated brief versions of all measures should be made available and promoted both for clinical and non-clinical settings to avoid the ad-hoc editing of standardised

## Loneliness – Consensus Statement

measures, rendering findings often invalid, misleading or confusing. Standardised measures of loneliness must be used in order to build a valid evidence base to help inform policy, practice and services.

### Causes

The determinants of loneliness are varied and complex. Understanding the complexity of the pathways into and out of loneliness requires research across a range of populations and sub-groups, including longitudinal studies. A better understanding of root causes, causal pathways and trajectories of loneliness should in turn facilitate individual and community strategies, interventions, as well as the targeted matching of interventions.

The role of environments appears important to the field and can be both enabling and disabling in terms of loneliness, like many other public issues. At the community/neighbourhood level, it is important to consider the risk factors that can contribute to loneliness such as community safety, design of the built environment, community and neighbourhood design, civic spaces, transportation, community engagement opportunities and access to activities and amenities within the local area [2,11].

At a societal level, we have limited evidence on the structural and cultural changes or societal forces that may foster loneliness and contribute to social determinants of health in the 21<sup>st</sup> century (i.e., public policies, public discourse, dominant political and economic ideologies that influence the structure of society and ultimately our health and wellbeing)[35]. In Western and capitalist economies, socioeconomic stresses and inequalities, automation, changing work, family, household and community structures and the increasing use of social media and the internet for services and goods may be contributing to an erosion of communities, loss of connections, meaning and purpose. However, the evidence on the impacts of societal factors on loneliness is limited. The perceptions

## Loneliness – Consensus Statement

1  
2  
3 and expectations of today's society around ageing, older people, ageism, and loneliness also need to  
4  
5 be untangled [2]. Evidence to date suggests that solutions for loneliness will need to be developed at  
6  
7 population as well as individual levels [11].  
8  
9

10  
11 While demographic ageing means loneliness is likely to increase numerically, the majority of older  
12  
13 adults are not chronically lonely and evidence indicates that loneliness is also experienced by other  
14  
15 age groups, especially young adults where levels are even higher than in older adults [18]. Although  
16  
17 not proportionally increasing in older adults [36-38], loneliness has risen up the agenda. Whether  
18  
19 this is connected to a broader sense of dissatisfaction, disconnection and fragmentation in current  
20  
21 society which may be expressing itself at present via an attachment to the concept of loneliness  
22  
23 remains unclear.  
24  
25  
26  
27

### Consequences

28  
29  
30 The consequences of loneliness on health and well-being can be profound. While there is  
31  
32 inadequate causal evidence, the associations with poor health and wellbeing have been established.  
33  
34 Evidence suggests associations with depression and anxiety, with evidence especially strong for  
35  
36 depression [39], non-communicable diseases (e.g., cardiovascular disease) [40], health behaviours  
37  
38 (e.g., physical activity) [41], stress, sleep [42-43], cognition [44] and premature mortality [45].  
39  
40 Paradoxically, there is a concern that chronic loneliness can adversely affect one's ability to connect  
41  
42 with others positively and to engage in interventions that could decrease loneliness.  
43  
44  
45  
46  
47

48  
49 Further work is required to strengthen the evidence for a causal link between loneliness and health  
50  
51 outcomes. Moreover, additional research is needed to determine how the duration and frequency of  
52  
53 loneliness contribute to health outcomes, and whether temporal effects differ across outcomes  
54  
55 (e.g., emotional versus cardiovascular status). Beyond health, the social consequences of loneliness  
56  
57 also remain unclear. There is a need for more robust research using standardised validated  
58  
59  
60

## Loneliness – Consensus Statement

measures, adjusted for potential confounders, mediators and moderators to assess if currently reported associations are independently predicted by loneliness and if so to what degree [46].

### Interventions

In response to the needs of older people and the issue of loneliness, the field of work in delivering programmes and policy is moving faster than the research community. This important work by charities, voluntary organisations and community partners can only benefit from the availability of a more robust evidence base [47]. The current evidence base for many interventions is characterised by low quality trials, small samples, a lack of theoretical frameworks or understanding of loneliness, diverse or undefined target groups, mixed measures of loneliness and short follow-up periods to assess longer term impact. Additionally, minimal attention has been directed toward determining the optimal intensity, duration and frequency of the therapeutic elements of loneliness interventions.

As well as the research evidence and alignment, political and civic leadership is needed to plan how best to incorporate loneliness interventions for an ageing population. Use of a public health approach, incorporating multiple perspectives and tailored for the needs of individuals may help prevent loneliness and yield societal benefits. Beyond the evaluation of existing programmes, better evidence on alternative interventions is needed. Strategies for generating evidence based interventions should include diverse populations and cultural settings and not be limited to clinical or other relatively accessible groups. Interventions incorporating preventive or therapeutic elements as identified in already successful interventions are also required. Additionally an assessment of the public health impact of community-based loneliness interventions should be determined, including the reach, effectiveness, adoption, implementation and maintenance of such programmes [48]. While not addressed adequately in the symposium, more attention towards determining the utility of primary, secondary and tertiary prevention is recommended. Potential examples include, for primary prevention, attention to design of the built and social environment to

## Loneliness – Consensus Statement

1  
2  
3 understand its impact on ability to connect and prevent loneliness and design effective solutions and  
4 programs, whether at one-on-one, social network, or collective social good levels. For people of all  
5  
6 ages, this could well involve community engagement in shared roles with meaning and benefit to the  
7  
8 community. Secondary prevention could involve screening for those at risk- such as those who have  
9  
10 newly retired or been widowed - whether at community or clinical levels, and identifying effective  
11  
12 interventions to help prevent loneliness in this at-risk group. Tertiary prevention could involve  
13  
14 recognition of those who are acutely or chronically lonely, with or with manifesting its sequelae, and  
15  
16 referral to programs for skill remediation, therapy and/or connection, as indicated.  
17  
18  
19  
20  
21

22 Overall interventions must be tailored and matched to specific root causes of loneliness in the  
23  
24 individual, supporting personalised solutions whereby the individual is met in their own  
25  
26 context/situation. While inevitably more complex to implement and evaluate, current evidence  
27  
28 indicates that this tailored approach is a necessity.  
29  
30

### **A way forward**

31  
32  
33 We need to more fully understand and address the causes and consequences of loneliness in later  
34  
35 life. Research and evidence gaps have been noted throughout this paper and we recommend that  
36  
37 research strategies are linked to complement and inform policy and practice interventions on  
38  
39 loneliness. Future research is needed to help expand our understanding of loneliness, causes and  
40  
41 consequences across the life course and in different groups such as young people, migrants, LGBT,  
42  
43 and other minority groups as well as country/cultural differences and diverse health domains  
44  
45 including the impact of enduring long term loneliness. The Consensus group discussed strategies on  
46  
47 how these should be addressed – including the establishment of the International Loneliness and  
48  
49 social Isolation research Network (I-LINK) as a vehicle to facilitate knowledge exchange and learning.  
50  
51 The research, policy and practice community and ultimately civic society can benefit from a greater  
52  
53 pooling of expertise and knowledge exchange in this area to ensure that we all play our part in  
54  
55 addressing loneliness.  
56  
57  
58  
59  
60

## Loneliness – Consensus Statement

### **Funding**

This consensus statement received no specific grant from any funding agency in the public, commercial, or not-for-profit sectors.

### **Declaration of conflicting interests**

The Authors declare that there is no conflict of interest.

## Loneliness – Consensus Statement

## References

1. Burholt V. The Complexity of Loneliness in Later Life: Addressing the Issues. *Loneliness in Later Life: Interventions – what works?* 5-7th December 2018, Belfast, Northern Ireland.
2. Fried L. Designing a new social infrastructure for 21st century needs. *Loneliness in Later Life: Interventions – what works?* 5-7th December 2018, Belfast, Northern Ireland.
3. Fried, L. Prohaska, T. Burholt, V. Burns, A. Golden, J. Hawkley, L. Lawlor, B. Leavey, G. Lubben, J. O’Sullivan, R. Perissinotto, C.; van Tilburg, T. Tully, M. Victor, C. (in press) *A unified approach to loneliness*. Lancet.
4. Golden J. A Clinical Experience of Loneliness – Reflections on Learning. *Loneliness in Later Life: Interventions – what works?* 5-7th December 2018, Belfast, Northern Ireland.
5. Leavey G. Loneliness in Ireland and the Irish Migrants. *Loneliness in Later Life: Interventions – what works?* 5-7th December 2018, Belfast, Northern Ireland.
6. Lubben J. Isolation and Loneliness – a US Perspective. *Loneliness in Later Life: Interventions – what works?* 5-7th December 2018, Belfast, Northern Ireland.
7. Lynch E. *Commissioner for Older People: Loneliness in Later Life*. *Loneliness in Later Life: Interventions – what works?* 5-7th December 2018, Belfast, Northern Ireland.
8. Moynihan S. ALONE: A national response to loneliness and improving the health and wellbeing of older and vulnerable adults in Ireland. *Loneliness in Later Life: Interventions – what works?* 5-7th December 2018, Belfast, Northern Ireland.
9. Murphy F. Campaign to end loneliness: learning for research, policy and practice. *Loneliness in Later Life: Interventions – what works?* 5-7th December 2018, Belfast, Northern Ireland.
10. Perissinotto C. The Role of the Health Professional in Loneliness Assessments. *Loneliness in Later Life: Interventions – what works?* 5-7th December 2018, Belfast, Northern Ireland.
11. Prohaska T. A public health approach to loneliness? *Loneliness in Later Life: Interventions – what works?* 5-7th December 2018, Belfast, Northern Ireland.

## Loneliness – Consensus Statement

12. Reid S. Public Health Agency: Loneliness in later life - Public health responses. *Loneliness in Later Life: Interventions – what works?* 5-7th December 2018, Belfast, Northern Ireland.
13. Sheridan B. Men’s Sheds: A model for addressing loneliness, isolation and improving health and wellbeing among men. *Loneliness in Later Life: Interventions – what works?* 5-7th December 2018, Belfast, Northern Ireland.
14. van Tilburg TG. Loneliness in the Netherlands. *Loneliness in Later Life: Interventions – what works?* 5-7th December 2018, Belfast, Northern Ireland.
15. Victor C. Loneliness - a UK Perspective - what we know, what we think we know and what we don't know. *Loneliness in Later Life: Interventions – what works?* 5-7th December 2018, Belfast, Northern Ireland.
16. O’Sullivan. R. The Age of Loneliness? Annual Public Health Lecture. Féile An Phobail. 6th August 2019. Belfast. Northern Ireland.
17. HM Government. A connected society: A strategy for tackling loneliness – laying the foundations for change. Department for Digital, Culture, Media and Sport. London. 2018.  
[Available from: <https://www.gov.uk/government/publications/a-connected-society-a-strategy-for-tackling-loneliness>.
18. Victor C, Mansfield L, Kay T, Daykin N, Lane J, Grigsby Duffy L, Meads C. An overview of reviews: the effectiveness of interventions to address loneliness at all stages of the life-course. What Works Centre for Wellbeing. 2018.
19. Perlman D, Peplau LA. Toward a social psychology of loneliness. *Personal relationships*. 1981;3:31-56.
20. De Jong Gierveld J, Kamphuis F. The development of a Rasch-type loneliness scale. *Appl Psychol Meas* 1985 Sep;9(3):289-99.
21. DiTommaso E, Spinner B. The development and initial validation of the Social and Emotional Loneliness Scale for Adults (SELSA). *Pers Individ Dif* 1993 Jan 1;14(1):127-34.



## Loneliness – Consensus Statement

- 1  
2  
3 22. Hawkley LC, Browne MW, Cacioppo JT. How can I connect with thee? Let me count the ways.  
4  
5 Psychol Sci 2005 Oct 16(10): 798-804.  
6  
7
- 8 23. Mayers AM, Khoo S and Svartberg M. The Existential Loneliness Questionnaire: Background,  
9  
10 development, and preliminary findings. J Clin Psychol 2002;**58**:1183-1193.  
11  
12 doi:10.1002/jclp.10038  
13
- 14 24. Russell D, Peplau LA, Cutrona CE. The revised UCLA Loneliness Scale: concurrent and  
15  
16 discriminant validity evidence. J Pers Soc Psychol 1980 Sep;**39**(3):472.  
17
- 18 25. Russell DW. UCLA Loneliness Scale (Version 3): Reliability, validity, and factor structure. J  
19  
20 Pers Assess 1996 Feb 1;**66**(1):20-40.  
21  
22
- 23 26. Russell DW. UCLA Loneliness Scale (Version 3): Reliability, validity, and factor structure. J  
24  
25 Pers Assess 1996 Feb 1;**66**(1):20-40.  
26  
27
- 28 27. De Jong Gierveld J, Van Tilburg TG. Manual of the loneliness scale. Amsterdam: VU  
29  
30 University 1999.  
31
- 32 28. De Jong Gierveld J, Van Tilburg T. The De Jong Gierveld short scales for emotional and social  
33  
34 loneliness: tested on data from 7 countries in the UN generations and gender surveys. Eur J  
35  
36 Ageing. 2010 Jun 1;**7**(2):121-30.  
37  
38
- 39 29. DiTommaso E, Brannen-McNulty C, Ross L, Burgess M. Attachment styles, social skills and  
40  
41 loneliness in young adults. Pers Individ Dif 2003 Jul 1;**35**(2):303-12.  
42
- 43 30. Lubben JE & Gironde MW. Measuring Social Networks and Assessing their Benefits.  
44  
45 Phillipson, C., Allan, G. & Morgan, D. (Eds.) Social Networks and Social Exclusion. Hants,  
46  
47 England: Ashgate; 2003. pp. 20-49.  
48  
49
- 50 31. Lubben J, Blozik E, Gillmann G, Iliffe S, von Renteln Kruse W, Beck JC, Stuck AE. Performance  
51  
52 of an abbreviated version of the Lubben Social Network Scale among three European  
53  
54 community-dwelling older adult populations. Gerontologist 2006 Aug 1;**46**(4):503-13.  
55  
56
- 57 32. Berkman LF, Syme SL. Social networks, host resistance, and mortality: a nine-year follow-up  
58  
59 study of Alameda County residents. Am J Epidemiol 1979 Feb 1;**109**(2):186-204.  
60

## Loneliness – Consensus Statement

- 1  
2  
3 33. Chang SC, Glymour M, Cornelis M, Walter S, Rimm EB, Tchetgen Tchetgen E, Kawachi I,  
4 Kubzansky LD. Social integration and reduced risk of coronary heart disease in women: the  
5 role of lifestyle behaviors. *Circ Res* 2017 Jun 9;**120**(12):1927-37.  
6  
7  
8  
9  
10 34. Newall NE, Menec VH. A comparison of different definitions of social isolation using  
11 Canadian Longitudinal Study on Aging (CLSA) data. *Ageing & Society*. 2019:1-24.  
12  
13  
14 35. Marmot M, Allen J, Goldblatt P, Boyce T, McNeish D, Grady M, Geddes I. The Marmot  
15 review: Fair society, healthy lives. The Strategic Review of Health Inequalities in England  
16 Post-2010. 2010 Feb. London: Marmot Review Team.  
17  
18  
19  
20 36. Hawkley, L., Wroblewski, K., Kaiser, T., Luhmann, M., & Schumm, L. P. (2019, April 26) (in  
21 press). Loneliness among NSHAP cohorts. <https://doi.org/10.31234/osf.io/vx9nh>  
22  
23  
24  
25 37. Victor CR, Scambler SJ, Shah S, Cook DG, Harris T, Rink E, et al. Has loneliness amongst older  
26 people increased? An investigation into variations between cohorts. 2002;**22**(5):585-97.  
27  
28  
29  
30 38. van Tilburg, T. G., Aartsen, M. J., & Van Der Pas, S. Loneliness after divorce: A cohort  
31 comparison among Dutch young-old adults. *European Sociological Reviews* 2015;**31**:243-  
32 252.  
33  
34  
35  
36 39. Cacioppo JT, Hawkley LC, Thisted RA. Perceived social isolation makes me sad: 5-year cross-  
37 lagged analyses of loneliness and depressive symptomatology in the Chicago Health, Aging,  
38 and Social Relations Study. *Psychol Aging* 2010 Jun;**25**(2):453.  
39  
40  
41  
42 40. Valtorta NK, Kanaan M, Gilbody S, Ronzi S, Hanratty B. Loneliness and social isolation as risk  
43 factors for coronary heart disease and stroke: systematic review and meta-analysis of  
44 longitudinal observational studies. *Heart* 2016;**102**(13):1009-1016.  
45  
46  
47  
48 41. Pels F, Kleinert J. Loneliness and physical activity: A systematic review. *International Review*  
49 *of Sport and Exercise Psychology*. 2016;9(1):231-60.  
50  
51  
52  
53 42. Choi H, Irwin MR, Cho HJ. Impact of social isolation on behavioral health in elderly:  
54 Systematic review. *World J Psychiatry*. 2015 Dec 22;**5**(4):432-8. doi: 10.5498/wjp.v5.i4.432.  
55  
56  
57  
58  
59  
60 PMID: 26740935; PMCID: PMC4694557.

## Loneliness – Consensus Statement

- 1  
2  
3 43. McHugh JE, Lawlor BA. Perceived stress mediates the relationship between emotional  
4 loneliness and sleep quality over time in older adults. *British journal of health psychology*.  
5  
6 2013 Sep;**18**(3):546-55.  
7  
8  
9  
10 44. Cacioppo JT, Hawkley LC. Perceived social isolation and cognition. *Trends in cognitive*  
11  
12 *sciences*. 2009 Oct 1;**13**(10):447-54.  
13  
14 45. Holt-Lunstad J, Smith TB, Baker M, Harris T, Stephenson DJ. Loneliness and social  
15  
16 isolation as risk factors for mortality: a meta-analytic review. 2015;**10**(2):227-37.  
17  
18 46. Burholt V, Winter B, Aartsen M, Constantinou C, Dahlberg L, Feliciano V, De Jong Gierveld J,  
19  
20 Van Regenmortel S, Waldegrave C. A critical review and development of a conceptual model  
21  
22 of exclusion from social relations for older people. *Eur J Ageing* 2019;1-17. 10.1007/s10433-  
23  
24 019-00506-0.  
25  
26  
27 47. Harvey B, Walsh K. Loneliness and ageing: Ireland, North and South. Dublin: Institute of  
28  
29 Public Health in Ireland, 2016.  
30  
31  
32 48. Glasgow RE, Vogt TM, Boles SM. Evaluating the public health impact of health promotion  
33  
34 interventions: the RE-AIM framework. *Am J Public Health* 1999 Sep;**89**(9):1322-7.  
35  
36

## Authorship Contribution Statement

37  
38  
39 Prof Thomas Prohaska and Prof Linda Fried led on the drafting of this manuscript. All other listed  
40 authors (Vanessa Burholt, Annette Burns, Jeannette Golden, Louise Hawkley, Brian Lawlor, Gerry  
41 Leavey, Jim Lubben, Roger O'Sullivan, Carla Perissinotto, Theo van Tilburg, Mark Tully, and Christina  
42 Victor) have made substantial contributions to the design and content of this paper during the  
43  
44 December meeting and/or subsequently to this meeting during the drafting and development of this  
45  
46 statement. All authors (Prof Thomas Prohaska Vanessa Burholt, Annette Burns, Jeannette Golden,  
47  
48 Louise Hawkley, Brian Lawlor, Gerry Leavey, Jim Lubben, Roger O'Sullivan, Carla Perissinotto, Theo  
49  
50 van Tilburg, Mark Tully, Christina Victor and Prof Linda Fried) also commented on drafts and assisted  
51  
52 in revising for important intellectual content before providing final approval for this version. All  
53  
54 listed authors (Prof Thomas Prohaska Vanessa Burholt, Annette Burns, Jeannette Golden, Louise  
55  
56 Hawkley, Brian Lawlor, Gerry Leavey, Jim Lubben, Roger O'Sullivan, Carla Perissinotto, Theo van  
57  
58 Tilburg, Mark Tully, Christina Victor and Prof Linda Fried) have agreed to be accountable for all  
59  
60

## Loneliness – Consensus Statement

aspects of the work in relations to its accuracy, integrity and the appropriate investigation and resolution of all associated questions.

For peer review only

# BMJ Open

## Consensus Statement - Loneliness in older adults, the 21st Century Social Determinant of Health?

|                                 |                                                                                                                                                                                                                                                                                                                                                                                                                                                                                                                                                                                                                                                                                                                                                                                                                                                                                                                                                                                                                                                                                                              |
|---------------------------------|--------------------------------------------------------------------------------------------------------------------------------------------------------------------------------------------------------------------------------------------------------------------------------------------------------------------------------------------------------------------------------------------------------------------------------------------------------------------------------------------------------------------------------------------------------------------------------------------------------------------------------------------------------------------------------------------------------------------------------------------------------------------------------------------------------------------------------------------------------------------------------------------------------------------------------------------------------------------------------------------------------------------------------------------------------------------------------------------------------------|
| Journal:                        | <i>BMJ Open</i>                                                                                                                                                                                                                                                                                                                                                                                                                                                                                                                                                                                                                                                                                                                                                                                                                                                                                                                                                                                                                                                                                              |
| Manuscript ID                   | bmjopen-2019-034967.R2                                                                                                                                                                                                                                                                                                                                                                                                                                                                                                                                                                                                                                                                                                                                                                                                                                                                                                                                                                                                                                                                                       |
| Article Type:                   | Communication                                                                                                                                                                                                                                                                                                                                                                                                                                                                                                                                                                                                                                                                                                                                                                                                                                                                                                                                                                                                                                                                                                |
| Date Submitted by the Author:   | 20-Apr-2020                                                                                                                                                                                                                                                                                                                                                                                                                                                                                                                                                                                                                                                                                                                                                                                                                                                                                                                                                                                                                                                                                                  |
| Complete List of Authors:       | <p>Prohaska, Thomas ; George Mason University<br/>         Burholt, Vanessa; The University of Auckland - City Campus; Swansea University<br/>         Burns, Annette; Institute of Public Health in Ireland; University of Ulster Faculty of Life and Health Sciences<br/>         Golden , Jeannette; Saint James's Hospital, Mercer's Institute for Successful Ageing<br/>         Hawkley, Louise; NORC at the University of Chicago, Academic Research Centers<br/>         Lawlor, Brian; Trinity College, The Global Brain Health Institute<br/>         Leavey, Gerard; University of Ulster, Psychology<br/>         Lubben, Jim; Boston College, Social Work<br/>         O'Sullivan, Roger; Institute of Public Health in Ireland; University of Ulster Faculty of Life and Health Sciences,<br/>         Perissinotto, Carla; University of California San Francisco School of Medicine<br/>         van Tilburg, Theo; University Amsterdam<br/>         Tully, Mark; University of Ulster<br/>         Victor, Christina; Brunel University<br/>         Fried, Linda; Columbia University</p> |
| <b>Primary Subject Heading</b>: | Public health                                                                                                                                                                                                                                                                                                                                                                                                                                                                                                                                                                                                                                                                                                                                                                                                                                                                                                                                                                                                                                                                                                |
| Secondary Subject Heading:      | Geriatric medicine, Communication                                                                                                                                                                                                                                                                                                                                                                                                                                                                                                                                                                                                                                                                                                                                                                                                                                                                                                                                                                                                                                                                            |
| Keywords:                       | GERIATRIC MEDICINE, PUBLIC HEALTH, Old age psychiatry < PSYCHIATRY                                                                                                                                                                                                                                                                                                                                                                                                                                                                                                                                                                                                                                                                                                                                                                                                                                                                                                                                                                                                                                           |
|                                 |                                                                                                                                                                                                                                                                                                                                                                                                                                                                                                                                                                                                                                                                                                                                                                                                                                                                                                                                                                                                                                                                                                              |

SCHOLARONE™  
Manuscripts

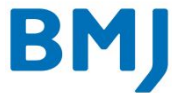

I, the Submitting Author has the right to grant and does grant on behalf of all authors of the Work (as defined in the below author licence), an exclusive licence and/or a non-exclusive licence for contributions from authors who are: i) UK Crown employees; ii) where BMJ has agreed a CC-BY licence shall apply, and/or iii) in accordance with the terms applicable for US Federal Government officers or employees acting as part of their official duties; on a worldwide, perpetual, irrevocable, royalty-free basis to BMJ Publishing Group Ltd ("BMJ") its licensees and where the relevant Journal is co-owned by BMJ to the co-owners of the Journal, to publish the Work in BMJ Open and any other BMJ products and to exploit all rights, as set out in our [licence](#).

The Submitting Author accepts and understands that any supply made under these terms is made by BMJ to the Submitting Author unless you are acting as an employee on behalf of your employer or a postgraduate student of an affiliated institution which is paying any applicable article publishing charge ("APC") for Open Access articles. Where the Submitting Author wishes to make the Work available on an Open Access basis (and intends to pay the relevant APC), the terms of reuse of such Open Access shall be governed by a Creative Commons licence – details of these licences and which [Creative Commons](#) licence will apply to this Work are set out in our licence referred to above.

Other than as permitted in any relevant BMJ Author's Self Archiving Policies, I confirm this Work has not been accepted for publication elsewhere, is not being considered for publication elsewhere and does not duplicate material already published. I confirm all authors consent to publication of this Work and authorise the granting of this licence.

## Loneliness – Consensus Statement

**Title:** *Consensus Statement - Loneliness in Older Adults, the 21<sup>st</sup> Century Social Determinant of Health?*

\*Corresponding author

Prof Roger O'Sullivan  
Institute of Public Health  
City Exchange  
Gloucester St  
Belfast, BT1 4JHE: roger.osullivan@publichealth.ie

### Co-Authors

- Prof Thomas Prohaska, College of Health and Human Services, George Mason University, USA
- Prof Vanessa Burholt, School of Nursing/School of Population Health, University of Auckland & Swansea University, New Zealand and UK
- Dr Annette Burns, Institute of Public Health & Bamford Centre for Mental Health and Well Being, Ulster University, Ireland & UK
- Dr Jeannette Golden, Mercer's Institute for Successful Ageing, St James Hospital Dublin, Ireland
- Dr Louise Hawkey, NORC at the University of Chicago, USA
- Prof Brian Lawlor, Global Brain Health Institute, Trinity College Dublin, Ireland
- Prof Gerry Leavey, Bamford Centre for Mental Health and Well Being, Ulster University, UK
- Prof Jim Lubben, School of Social Work, Boston College, University of California, Los Angeles Luskin School of Public Affairs, USA
- Prof Roger O'Sullivan, Institute of Public Health & Bamford Centre for Mental Health and Well Being, Ulster University, Ireland & UK\*
- Dr Carla Perissinotto, Division of Geriatrics, Department of Medicine, University of California San Francisco, USA
- Prof Theo van Tilburg, Department of Sociology, Faculty of Social Sciences, Vrije Universiteit Amsterdam, Netherland
- Prof Mark Tully, School of Health Sciences, Ulster University, UK
- Prof Christina Victor, College of Health and Life Sciences, Brunel University London, UK
- Prof Linda Fried, Mailman School of Public Health, Columbia University, USA

Keywords: Loneliness; Health and Wellbeing; Interventions; Ageing

Word count: main text 2741

## Loneliness – Consensus Statement

### Abstract

#### **Consensus Statement - Loneliness in Older Adults, the 21<sup>st</sup> Century Social Determinant of Health?**

#### Objective

The purpose of this consensus statement is to determine the state of the field of loneliness among older people, highlighting key issues for researchers, policymakers and those designing services and interventions.

#### Methods

In December 2018, an international meeting on loneliness was held in Belfast with leaders from across the USA and Europe. A summary of the conclusions reached at this event is presented following a consensus building exercise conducted both during this event after each presentation as well as after the event through the drafting, reviewing and agreement of this statement by all authors over 6 months.

#### Results

This meeting resulted in agreement to produce a consensus statement on key issues including definitions of loneliness, measurement, antecedents, consequences and interventions.

#### Discussion

There has been an exponential growth in research on loneliness among older adults. However differing measurements and definitions of loneliness means the incidence and prevalence, associated risk factors and health consequences are often conflicting or confusing especially for those developing policy and services.



## Loneliness – Consensus Statement

### **Consensus Statement - Loneliness in Older Adults, the 21<sup>st</sup> Century Social Determinant of Health?**

In December 2018, a group of international researchers, practitioners and policymakers working in the area of ageing met as part of a three-day symposium held in Belfast, Northern Ireland to discuss loneliness, its impacts and appropriate interventions [1-15]. It is encouraging that there has been an exponential growth in research on loneliness and social isolation among older adults of late, in recognition of the significance of loneliness as an adverse experience in older age. However, limitations persist in the evidence base, in relation to impacts, risk factors, assessment and especially interventions. The objective of the Belfast meeting was to determine the state of the field of loneliness among older people, highlighting best practices, evidence and key research gaps. The following consensus statement emerged from these discussions in relation to the current status of policy, practice and especially research on loneliness.

#### **Context**

It seems there have never been so many ways to connect with people, yet the fear of loneliness is increasingly capturing public attention, driving the issue further up policy agendas across the world [16]. For example, in the UK, 2018 saw the launch of a loneliness strategy [17] and a loneliness minister appointed. In the US, the National Academies of Sciences, Engineering, and Medicine have formed a committee to examine how social isolation and loneliness impact health outcomes in older adults, its report released in February of 2020 [18]. The AARP in the US and the Campaign to End Loneliness in the UK have established awareness raising work and visibility in this area. Campaigns are an important necessary step to raise awareness to effectively address the stigma of loneliness but are not sufficient especially for the development of effective interventions.

With growing concern about rates and consequences of loneliness in civic society, there is also an increasing body of research on loneliness and social isolation among older adults especially in high income countries (HICs). However, there are significant gaps in our understanding of the 'true rates' of loneliness within and across countries, the drivers of loneliness in different populations and sub-

## Loneliness – Consensus Statement

1  
2  
3 groups, its impact on health and well-being, and a lack of high quality evidence on effective  
4  
5 solutions. In low- and middle-income countries (LMICs), research to underpin the allocation of  
6  
7 resources to meet medical needs, and/or to secure adequate food and housing in later life has been  
8  
9 given greater priority than studies on loneliness [19]. In summary, evidence to support appropriate  
10  
11 action in addressing loneliness is urgently needed. However, a number of building blocks are  
12  
13 required in relation to definitions, measurement, antecedents, consequences and ultimately  
14  
15 effective interventions [18, 20]  
16  
17  
18  
19  
20

## Methods

21  
22  
23  
24  
25 At our three-day event in December 2018, AB took detailed notes during all presentations and  
26  
27 discussions. Following the event, AB synthesised these notes to produce a single document detailing  
28  
29 all topics on which some consensus was reached at the event in relation to loneliness in older adults  
30  
31 i.e. multiple authors had supported a statement or argument. This document was then sectioned  
32  
33 into issues related to: definition and types of loneliness; measurement of loneliness; antecedents of  
34  
35 loneliness; consequences of loneliness; and interventions. This document was shared with ROS and  
36  
37 TP to refine further before being shared with all authors to check consensus. Following each  
38  
39 circulation, any issues raised by authors were synthesized with feedback requested from all authors  
40  
41 again prior to a new draft based on these agreed changes being circulated. Following a 6-month  
42  
43 period and the circulation of multiple drafts, all authors signed off on a final consensus statement  
44  
45 (the content of this communication) which represented the views of all and addressed all issues  
46  
47 raised during the process to the satisfaction of all.  
48  
49  
50  
51  
52  
53  
54  
55  
56  
57  
58  
59  
60

## Loneliness – Consensus Statement

### Definitions

Loneliness has been defined in many ways and an agreed definition of loneliness remains elusive but it is acknowledged as distinct from social isolation and social exclusion [10]. Loneliness is a subjective negative experience that results from inadequate meaningful connections, where “inadequate” refers to the discrepancy or unmet need between an individual’s preferred and actual experience [3,21]. Loneliness has been described in a range of different domains and experienced as a sense of inadequate social connection to:

- a) an intimate other person,
- b) family and friends, and
- c) community life, collective identity and roles bringing connections to the broader society with meaning and purpose

Different domains of loneliness are reflected in research that distinguishes between emotional and social loneliness, where emotional loneliness is characterized by the absence of an intimate connection and social loneliness is characterized by the absence of contact and engagement with a broader network of friends, neighbours, and colleagues [22-23]. Others have distinguished between loneliness that is intimate, relational (marked by the perceived lack of close friends/confidants), and collective (characterized by a perceived lack of a sense of belonging or group identity)[24]. Still others discuss existential loneliness [25].

To date, the range of definitions of loneliness has been useful for drawing attention to the issue but not sufficient for advancing the field to explain, for example, the intensity, frequency and duration of loneliness. Loneliness can be acute (i.e., transient) or chronic (i.e., enduring), and it can be mild to severe in its intensity. Moreover, it can stem from a variety of antecedents, and each precursor may require a unique “solution”. Researchers, policymakers and practitioners all tend to define and

## Loneliness – Consensus Statement

1  
2  
3 discuss loneliness differently which can create confusion as to what is meant as well as what actions  
4  
5 to take for policy, services and society. To deliver effective policy and practice requires a more  
6  
7 nuanced understanding of the complexity of loneliness (e.g., the different pathways, types, and ways  
8  
9 of addressing loneliness) which, while not considered a medical condition, can have an impact on  
10  
11 health.  
12  
13  
14  
15

16 Further theoretical and empirical work is needed to adequately conceptualise the complexity of  
17  
18 loneliness, and to distinguish its various domains and types and frequencies. Unfortunately, the  
19  
20 focus has tended to be on social loneliness with relative neglect of other types of loneliness. In  
21  
22 particular, there is a need to develop a unified language and definition(s) to facilitate the discussion  
23  
24 of loneliness, its evidence, and mechanisms for its effects, and to develop theoretical frameworks  
25  
26 that situate loneliness and its antecedents and consequences in a global social context. Doing so  
27  
28 would also permit accurate comparisons of global loneliness trends, and could accelerate the  
29  
30 development and dissemination of interventions across countries.  
31  
32  
33  
34

### Measurement

35  
36  
37  
38 Directly connected to definitions, standardised and validated measurement of loneliness is crucial.  
39  
40 Currently, different studies use a mixture of scales (which assess frequency only) and single-item  
41  
42 measures, while some reviews have further combined these with aspects such as living alone and  
43  
44 marital status under the umbrella term of isolation/loneliness, leading to an ambiguous and  
45  
46 unreliable evidence base.  
47  
48  
49  
50

51 The most widely-used validated loneliness scales are:

- 52 • UCLA Loneliness Scale [26]; Revised UCLA Loneliness Scale, version 3 [27]; UCLA 3-item  
53 Loneliness Scale [28]
- 54 • the De Jong Gierveld 11-item or 6-item Loneliness Scale [22,29-30].  
55  
56  
57  
58  
59  
60

## Loneliness – Consensus Statement

1  
2  
3 The UCLA Loneliness scale is intended to assess loneliness as a unitary construct; dimensions of the  
4  
5 loneliness experience have been identified in factor analyses but they are subsumed in a higher level  
6  
7 loneliness construct. In contrast, the De Jong Gierveld scale assesses overall as well as emotional and  
8  
9 social loneliness through its subscales. Though less widely used, the Social and Emotional Loneliness  
10  
11 Scale for Adults (SELSA) [23] also distinguishes between social and emotional loneliness and further  
12  
13 distinguishes two domains of emotional loneliness - family and romantic. In addition to the original  
14  
15 37-item measure, a revised 15-item version is also used [31].  
16  
17

18  
19 While not always co-occurring, there is an association and /overlap between social isolation and  
20  
21 loneliness [1,10]. Common measures of social isolation include the six-item Lubben Social Network  
22  
23 Scale (LSNS-6) [32-33] and the four-item Berkman-Syme Social Network Index (SNI) [34-35]. To date  
24  
25 there has been no consensus statement on social isolation in terms of definitions, measurement and  
26  
27 scales however many of the points made in the current paper in relation to loneliness are also  
28  
29 relevant [36].  
30  
31

32  
33 The symposium participants did not explore or compare measures or their relative utility. However,  
34  
35 it was recognised that a common set of validated measures of loneliness is needed in order to  
36  
37 examine findings across research and interventions. The systematic inclusion of a harmonised set of  
38  
39 covariates, demographic factors and antecedent or predictor measures would also facilitate meta-  
40  
41 analyses and evidence-based reviews. A selection of scales currently used to assess both loneliness  
42  
43 and isolation is available here (<https://www.publichealth.ie/ILINK>).  
44  
45  
46  
47

48  
49 A consensus was reached that validated brief versions of all measures should be made available and  
50  
51 promoted both for clinical and non-clinical settings to avoid the ad-hoc editing of standardised  
52  
53 measures, rendering findings often invalid, misleading or confusing<sup>1</sup>. Standardised measures of  
54  
55  
56

---

57  
58 <sup>1</sup> This conclusion of not using measures ad-hoc is also supported by National Academies of Sciences,  
59  
60 Engineering, and Medicine Report [18]

## Loneliness – Consensus Statement

loneliness must be used in order to build a valid evidence base to help inform policy, practice and services. It is also recognised that these scales have been developed in HIC/individualistic cultures and thus require validation in LMIC, and collectivist cultures, where they may not be as relevant or capture all dimensions.

### **Antecedents**

The determinants of loneliness are varied and complex. Understanding the complexity of the pathways into and out of loneliness requires research across a range of populations and sub-groups, including longitudinal studies. A better understanding of root causes, pathways and trajectories of loneliness should in turn facilitate individual and community strategies, interventions, as well as the targeted matching of interventions.

Personal level characteristics (e.g. gender, marital status, socio-economic status) are often included as antecedents to loneliness in research, but there is less focus on the role of environmental and structural factors. The role of environments appears important to the field and can be both enabling and disabling in terms of loneliness, like many other public issues. At the community/neighbourhood level, it is important to consider the risk factors that can contribute to loneliness such as community safety, design of the built environment, community and neighbourhood design, civic spaces, transportation, community engagement opportunities and access to activities and amenities within the local area [2,11].

At a societal level, we have limited evidence on the structural and cultural changes or societal forces that may foster loneliness and contribute to social determinants of health in the 21<sup>st</sup> century (i.e., public policies, public discourse, dominant political and economic ideologies that influence the structure of society and ultimately our health and wellbeing)[37]. In Western and capitalist economies, socioeconomic stresses and inequalities, automation, changing work, family, household

## Loneliness – Consensus Statement

1  
2  
3 and community structures and the increasing use of social media and the internet for services and  
4  
5 goods may be contributing to an erosion of communities, loss of connections, meaning and purpose.  
6  
7 However, the evidence on the impacts of societal factors on loneliness is limited. The perceptions  
8  
9 and expectations of today's society around ageing, older people, ageism, and loneliness also need to  
10  
11 be untangled [2]. Evidence to date suggests that solutions for loneliness will need to be developed at  
12  
13 population as well as individual levels [11].  
14  
15  
16  
17

18  
19 While demographic ageing means loneliness is likely to increase numerically, the majority of older  
20  
21 adults are not chronically lonely and evidence indicates that loneliness is also experienced by other  
22  
23 age groups, especially young adults where levels are even higher than in older adults [20]. Although  
24  
25 not proportionally increasing in older adults [38-40], loneliness has risen up the agenda. Whether  
26  
27 this is connected to a broader sense of dissatisfaction, disconnection and fragmentation in current  
28  
29 society which may be expressing itself at present via an attachment to the concept of loneliness  
30  
31 remains unclear.  
32  
33  
34

### Consequences

35  
36  
37  
38 The consequences of loneliness on health and well-being can be profound. While there is  
39  
40 inadequate causal evidence, the associations with poor health and wellbeing have been established.  
41  
42 Evidence suggests associations with mental health, with evidence especially strong for depression  
43  
44 [41], non-communicable diseases (e.g., cardiovascular disease) [42], health behaviours (e.g., physical  
45  
46 activity) [43], stress, sleep [44-45], cognition [46] and premature mortality [47]. Paradoxically, there  
47  
48 is a concern that chronic loneliness can adversely affect one's ability to connect with others  
49  
50 positively and to engage in interventions that could decrease loneliness.  
51  
52  
53  
54

55  
56 Further work is required to strengthen the evidence for a causal link between loneliness and health  
57  
58 outcomes. Moreover, additional research is needed to determine how the duration and frequency of  
59  
60

## Loneliness – Consensus Statement

loneliness contribute to health outcomes, and whether temporal effects differ across outcomes (e.g., emotional versus cardiovascular status). Beyond health, the social consequences of loneliness also remain unclear. There is a need for more robust research using standardised validated measures, adjusted for potential confounders, mediators and moderators to assess if currently reported associations are independently predicted by loneliness and if so to what degree [48].

### Interventions

In response to the needs of older people and the issue of loneliness, the field of work in delivering programmes and policy is moving faster than the research community. This important work by charities, voluntary organisations and community partners can only benefit from the availability of a more robust evidence base [49]. The current evidence base for many interventions is characterised by low quality trials, small samples, a lack of theoretical frameworks or understanding of loneliness, diverse or undefined target groups, mixed measures of loneliness and short follow-up periods to assess longer term impact. While we recommend appropriate use of the validated widely used measures described above we also acknowledge that minimal attention has been directed toward determining the optimal intensity, duration and frequency of the therapeutic elements of loneliness interventions and further validated established outcomes are therefore needed.

As well as the research evidence and alignment, political and civic leadership is needed to plan how best to incorporate loneliness interventions for an ageing population. Use of a public health approach, incorporating multiple perspectives and tailored for the needs of individuals may help prevent loneliness and yield societal benefits. Beyond the evaluation of existing programmes, better evidence on alternative interventions is needed. Strategies for generating evidence-based interventions should include diverse populations and cultural settings and not be limited to clinical or other relatively accessible groups. Interventions incorporating preventive or therapeutic elements as identified in already successful interventions are also required. Additionally, an assessment of the public health impact of community-based loneliness interventions should be determined, including



## Loneliness – Consensus Statement

the reach, effectiveness, adoption, implementation and maintenance of such programmes [50].

While not addressed adequately in the symposium, more attention towards determining the utility of primary, secondary and tertiary prevention is recommended. Potential examples include, for primary prevention, attention to design of the built and social environment to understand its impact on ability to connect and prevent loneliness and design effective solutions and programs, whether at one-on-one, social network, or collective social good levels. For people of all ages, this could well involve community engagement in shared roles with meaning and benefit to the community.

Secondary prevention could involve screening for those at risk- such as those who have newly retired or been widowed - whether at community or clinical levels, and identifying effective interventions to help prevent loneliness in this at-risk group. Tertiary prevention could involve recognition of those who are acutely or chronically lonely, with or without manifesting its sequelae, and referral to programs for skill remediation, therapy and/or connection, as indicated.

Overall interventions must be tailored and matched to specific root causes of loneliness in the individual, supporting personalised solutions whereby the individual is met in their own context/situation. While inevitably more complex to implement and evaluate, current evidence indicates that this tailored approach is a necessity.

### **A way forward**

We need to more fully understand and address the antecedents and consequences of loneliness in later life. Research and evidence gaps have been noted throughout this paper and we recommend that research strategies are linked to complement and inform policy and practice interventions on loneliness. Future research is needed to help expand our understanding of loneliness, antecedents and consequences across the life course and in different groups such as young people, migrants, LGBT, and other minority groups as well as country/cultural differences and diverse health domains including the impact of enduring long term loneliness. The Consensus group discussed strategies on how these should be addressed – including the establishment of the International Loneliness and

## Loneliness – Consensus Statement

1  
2  
3 social Isolation research Network (I-LINK) as a vehicle to facilitate knowledge exchange and learning.  
4  
5 The research, policy and practice community and ultimately civic society can benefit from a greater  
6  
7 pooling of expertise and knowledge exchange in this area to ensure that we all play our part in  
8  
9 addressing loneliness.  
10  
11  
12

### Limitations

13  
14  
15  
16 This statement is limited by its lack of data or representatives from LMICs countries and also by its  
17  
18 broad focus on English speaking countries with only one author from a country where English is not  
19  
20 the first language represented (the Netherlands). The representatives of this group have however  
21  
22 worked in LMICs and with ethnic minority groups from these countries. As a group, we acknowledge  
23  
24 the lack of research from LMICs on prevalence, pathways, and cultural differences in measurement.  
25  
26  
27

### Acknowledgements

28  
29  
30  
31 We would like to thank all the contributors (practitioners, policymakers and researchers) to the  
32  
33 symposium for their presentations and for the insightful discussion that took place over the three  
34  
35 days.  
36  
37

### Funding

38  
39  
40  
41 This consensus statement received no specific grant from any funding agency in the public,  
42  
43 commercial, or not-for-profit sectors.  
44  
45  
46

### Declaration of conflicting interests

47  
48  
49  
50 The Authors declare that there is no conflict of interest.  
51  
52  
53  
54  
55  
56  
57  
58  
59  
60

## Loneliness – Consensus Statement

## References

1. Burholt V. The Complexity of Loneliness in Later Life: Addressing the Issues. *Loneliness in Later Life: Interventions – what works?* 5-7th December 2018, Belfast, Northern Ireland.  
<https://publichealth.ie/ilink/>
2. Fried L. Designing a new social infrastructure for 21st century needs. *Loneliness in Later Life: Interventions – what works?* 5-7th December 2018, Belfast, Northern Ireland.  
<https://publichealth.ie/ilink/>
3. Fried LP, Prohaska T, Burholt V, Burns A, Golden J, Hawkley L, Lawlor B, Leavey G, Lubben J, O'Sullivan R, Perissinotto C, van Tilburg T, Tully M and V. C. (2020). "A unified approach to loneliness. ." *The Lancet* **395**(10218): 114.
4. Golden J. A Clinical Experience of Loneliness – Reflections on Learning. *Loneliness in Later Life: Interventions – what works?* 5-7th December 2018, Belfast, Northern Ireland.  
<https://publichealth.ie/ilink/>
5. Leavey G. Loneliness in Ireland and the Irish Migrants. *Loneliness in Later Life: Interventions – what works?* 5-7th December 2018, Belfast, Northern Ireland. <https://publichealth.ie/ilink/>
6. Lubben J. Isolation and Loneliness – a US Perspective. *Loneliness in Later Life: Interventions – what works?* 5-7th December 2018, Belfast, Northern Ireland. <https://publichealth.ie/ilink/>
7. Lynch E. *Commissioner for Older People: Loneliness in Later Life. Loneliness in Later Life: Interventions – what works?* 5-7th December 2018, Belfast, Northern Ireland.  
<https://publichealth.ie/ilink/>
8. Moynihan S. ALONE: A national response to loneliness and improving the health and wellbeing of older and vulnerable adults in Ireland. *Loneliness in Later Life: Interventions – what works?* 5-7th December 2018, Belfast, Northern Ireland. <https://publichealth.ie/ilink/>
9. Murphy F. Campaign to end loneliness: learning for research, policy and practice. *Loneliness in Later Life: Interventions – what works?* 5-7th December 2018, Belfast, Northern Ireland.  
<https://publichealth.ie/ilink/>

## Loneliness – Consensus Statement

- 1  
2  
3 10. Perissinotto C. The Role of the Health Professional in Loneliness Assessments. *Loneliness in*  
4  
5 *Later Life: Interventions – what works?* 5-7th December 2018, Belfast, Northern Ireland.  
6  
7 <https://publichealth.ie/ilink/>  
8  
9
- 10 11. Prohaska T. A public health approach to loneliness? *Loneliness in Later Life: Interventions –*  
11  
12 *what works?* 5-7th December 2018, Belfast, Northern Ireland. <https://publichealth.ie/ilink/>  
13  
14
- 15 12. Reid S. Public Health Agency: Loneliness in later life - Public health responses. *Loneliness in*  
16  
17 *Later Life: Interventions – what works?* 5-7th December 2018, Belfast, Northern Ireland.  
18  
19 <https://publichealth.ie/ilink/>  
20
- 21 13. Sheridan B. Men’s Sheds: A model for addressing loneliness, isolation and improving health  
22  
23 and wellbeing among men. *Loneliness in Later Life: Interventions – what works?* 5-7th  
24  
25 December 2018, Belfast, Northern Ireland. <https://publichealth.ie/ilink/>  
26  
27
- 28 14. van Tilburg TG. Loneliness in the Netherlands. *Loneliness in Later Life: Interventions – what*  
29  
30 *works?* 5-7th December 2018, Belfast, Northern Ireland. <https://publichealth.ie/ilink/>  
31  
32
- 33 15. Victor C. Loneliness - a UK Perspective - what we know, what we think we know and what  
34  
35 we don't know. *Loneliness in Later Life: Interventions – what works?* 5-7th December 2018,  
36  
37 Belfast, Northern Ireland. <https://publichealth.ie/ilink/>  
38
- 39 16. O’Sullivan. R. The Age of Loneliness? Annual Public Health Lecture. Féile An Phobail. 6th  
40  
41 August 2019. Belfast. Northern Ireland.  
42  
43
- 44 17. HM Government. A connected society: A strategy for tackling loneliness – laying the  
45  
46 foundations for change. Department for Digital, Culture, Media and Sport. London. 2018.  
47  
48 [Available from: [https://www.gov.uk/government/publications/a-connected-society-a-](https://www.gov.uk/government/publications/a-connected-society-a-strategy-for-tackling-loneliness)  
49  
50 [strategy-for-tackling-loneliness](https://www.gov.uk/government/publications/a-connected-society-a-strategy-for-tackling-loneliness).  
51  
52
- 53 18. National Academies of Sciences, E. and Medicine (2020). Social Isolation and Loneliness in  
54  
55 Older Adults: Opportunities for the Health Care System. Washington, DC, The National  
56  
57 Academies Press.  
58  
59  
60

## Loneliness – Consensus Statement

19. Burholt, V. and Scharf, T., (in press) Critical social gerontology and rural ageing. In, Skinner, M., Winterton, R. and Walsh, K., Rural gerontology: Towards critical perspectives on rural ageing. Routledge: London and New York
20. Victor C, Mansfield L, Kay T, Daykin N, Lane J, Grigsby Duffy L, Meads C. An overview of reviews: the effectiveness of interventions to address loneliness at all stages of the life-course. What Works Centre for Wellbeing. 2018.
21. Perlman D, Peplau LA. Toward a social psychology of loneliness. Personal relationships. 1981;3:31-56.
22. De Jong Gierveld J, Kamphuls F. The development of a Rasch-type loneliness scale. Appl Psychol Meas 1985 Sep;9(3):289-99.
23. DiTommaso E, Spinner B. The development and initial validation of the Social and Emotional Loneliness Scale for Adults (SELSA). Pers Individ Dif 1993 Jan 1;14(1):127-34.
24. Hawkley LC, Browne MW, Cacioppo JT. How can I connect with thee? Let me count the ways. Psychol Sci 2005 Oct 16(10): 798-804.
25. Mayers AM, Khoo S and Svartberg M. The Existential Loneliness Questionnaire: Background, development, and preliminary findings. J Clin Psychol 2002;58:1183-1193.  
doi:10.1002/jclp.10038
26. Russell D, Peplau LA, Cutrona CE. The revised UCLA Loneliness Scale: concurrent and discriminant validity evidence. J Pers Soc Psychol 1980 Sep;39(3):472.
27. Russell DW. UCLA Loneliness Scale (Version 3): Reliability, validity, and factor structure. J Pers Assess 1996 Feb 1;66(1):20-40.
28. Russell DW. UCLA Loneliness Scale (Version 3): Reliability, validity, and factor structure. J Pers Assess 1996 Feb 1;66(1):20-40.
29. De Jong Gierveld J, Van Tilburg TG. Manual of the loneliness scale. Amsterdam: VU University 1999.

## Loneliness – Consensus Statement

- 1  
2  
3 30. De Jong Gierveld J, Van Tilburg T. The De Jong Gierveld short scales for emotional and social  
4 loneliness: tested on data from 7 countries in the UN generations and gender surveys. Eur J  
5 Ageing. 2010 Jun 1;**7**(2):121-30.  
6  
7  
8  
9  
10 31. DiTommaso E, Brannen-McNulty C, Ross L, Burgess M. Attachment styles, social skills and  
11 loneliness in young adults. Pers Individ Dif 2003 Jul 1;**35**(2):303-12.  
12  
13  
14 32. Lubben JE & Gironde MW. Measuring Social Networks and Assessing their Benefits.  
15 Phillipson, C., Allan, G. & Morgan, D. (Eds.) Social Networks and Social Exclusion. Hants,  
16 England: Ashgate; 2003. pp. 20-49.  
17  
18  
19  
20  
21 33. Lubben J, Blozik E, Gillmann G, Iliffe S, von Renteln Kruse W, Beck JC, Stuck AE. Performance  
22 of an abbreviated version of the Lubben Social Network Scale among three European  
23 community-dwelling older adult populations. Gerontologist 2006 Aug 1;**46**(4):503-13.  
24  
25  
26  
27  
28 34. Berkman LF, Syme SL. Social networks, host resistance, and mortality: a nine-year follow-up  
29 study of Alameda County residents. Am J Epidemiol 1979 Feb 1;**109**(2):186-204.  
30  
31  
32  
33 35. Chang SC, Glymour M, Cornelis M, Walter S, Rimm EB, Tchetgen Tchetgen E, Kawachi I,  
34 Kubzansky LD. Social integration and reduced risk of coronary heart disease in women: the  
35 role of lifestyle behaviors. Circ Res 2017 Jun 9;**120**(12):1927-37.  
36  
37  
38  
39 36. Newall NE, Menec VH. A comparison of different definitions of social isolation using  
40 Canadian Longitudinal Study on Aging (CLSA) data. Ageing & Society. 2019:1-24.  
41  
42  
43  
44 37. Marmot M, Allen J, Goldblatt P, Boyce T, McNeish D, Grady M, Geddes I. The Marmot  
45 review: Fair society, healthy lives. The Strategic Review of Health Inequalities in England  
46 Post-2010. 2010 Feb. London: Marmot Review Team.  
47  
48  
49  
50 38. Hawkey, L. C., Wroblewski, K., Kaiser, T., Luhmann, M., & Schumm, L. P. (2019). Are U.S.  
51 older adults getting lonelier? Age, period, and cohort differences. Psychology and Aging, 34,  
52 1144-1157. doi: 10.1037/pag0000365  
53  
54  
55  
56  
57 39. Victor CR, Scambler SJ, Shah S, Cook DG, Harris T, Rink E, et al. Has loneliness amongst older  
58 people increased? An investigation into variations between cohorts. 2002;**22**(5):585-97.  
59  
60

## Loneliness – Consensus Statement

- 1  
2  
3 40. van Tilburg, T. G., Aartsen, M. J., & Van Der Pas, S. Loneliness after divorce: A cohort  
4  
5 comparison among Dutch young-old adults. *European Sociological Reviews* 2015;**31**:243-  
6  
7 252.  
8  
9  
10 41. Cacioppo JT, Hawkley LC, Thisted RA. Perceived social isolation makes me sad: 5-year cross-  
11  
12 lagged analyses of loneliness and depressive symptomatology in the Chicago Health, Aging,  
13  
14 and Social Relations Study. *Psychol Aging* 2010 Jun;**25**(2):453.  
15  
16 42. Valtorta NK, Kanaan M, Gilbody S, Ronzi S, Hanratty B. Loneliness and social isolation as risk  
17  
18 factors for coronary heart disease and stroke: systematic review and meta-analysis of  
19  
20 longitudinal observational studies. *Heart* 2016;**102**(13):1009-1016.  
21  
22  
23 43. Pels F, Kleinert J. Loneliness and physical activity: A systematic review. *International Review*  
24  
25 of Sport and Exercise Psychology. 2016;**9**(1):231-60.  
26  
27  
28 44. Choi H, Irwin MR, Cho HJ. Impact of social isolation on behavioral health in elderly:  
29  
30 Systematic review. *World J Psychiatry*. 2015 Dec 22;**5**(4):432-8. doi: 10.5498/wjp.v5.i4.432.  
31  
32 PMID: 26740935; PMCID: PMC4694557.  
33  
34 45. McHugh JE, Lawlor BA. Perceived stress mediates the relationship between emotional  
35  
36 loneliness and sleep quality over time in older adults. *British journal of health psychology*.  
37  
38 2013 Sep;**18**(3):546-55.  
39  
40  
41 46. Cacioppo JT, Hawkley LC. Perceived social isolation and cognition. *Trends in cognitive*  
42  
43 sciences. 2009 Oct 1;**13**(10):447-54.  
44  
45  
46 47. Holt-Lunstad J, Smith TB, Baker M, Harris T, Stephenson DJ. Loneliness and social  
47  
48 isolation as risk factors for mortality: a meta-analytic review. 2015;**10**(2):227-37.  
49  
50 48. Burholt V, Winter B, Aartsen M, Constantinou C, Dahlberg L, Feliciano V, De Jong Gierveld J,  
51  
52 Van Regenmortel S, Waldegrave C. A critical review and development of a conceptual model  
53  
54 of exclusion from social relations for older people. *Eur J Ageing* 2019:1-17. 10.1007/s10433-  
55  
56 019-00506-0.  
57  
58  
59  
60

## Loneliness – Consensus Statement

1  
2  
3 49. Harvey B, Walsh K. Loneliness and ageing: Ireland, North and South. Dublin: Institute of  
4  
5 Public Health in Ireland, 2016.

6  
7  
8 50. Glasgow RE, Vogt TM, Boles SM. Evaluating the public health impact of health promotion  
9  
10 interventions: the RE-AIM framework. Am J Public Health 1999 Sep;**89**(9):1322-7.

## Authorship Contribution Statement

11  
12  
13  
14  
15  
16 Prof Thomas Prohaska and Prof Linda Fried led on the drafting of this manuscript. All other listed  
17 authors (Vanessa Burholt, Annette Burns, Jeannette Golden, Louise Hawkley, Brian Lawlor, Gerry  
18 Leavey, Jim Lubben, Roger O’Sullivan, Carla Perissinotto, Theo van Tilburg, Mark Tully, and Christina  
19 Victor) have made substantial contributions to the design and content of this paper during the  
20 December meeting and/or subsequently to this meeting during the drafting and development of this  
21 statement. All authors (Prof Thomas Prohaska Vanessa Burholt, Annette Burns, Jeannette Golden,  
22 Louise Hawkley, Brian Lawlor, Gerry Leavey, Jim Lubben, Roger O’Sullivan, Carla Perissinotto, Theo  
23 van Tilburg, Mark Tully, Christina Victor and Prof Linda Fried) also commented on drafts and assisted  
24 in revising for important intellectual content before providing final approval for this version. All  
25 listed authors (Prof Thomas Prohaska Vanessa Burholt, Annette Burns, Jeannette Golden, Louise  
26 Hawkley, Brian Lawlor, Gerry Leavey, Jim Lubben, Roger O’Sullivan, Carla Perissinotto, Theo van  
27 Tilburg, Mark Tully, Christina Victor and Prof Linda Fried) have agreed to be accountable for all  
28 aspects of the work in relations to its accuracy, integrity and the appropriate investigation and  
29 resolution of all associated questions.  
30  
31  
32  
33  
34  
35  
36  
37  
38  
39  
40  
41  
42  
43  
44  
45  
46  
47  
48  
49  
50  
51  
52  
53  
54  
55  
56  
57  
58  
59  
60
