# Supplementary material for: Consensus statement: loneliness in older adults, the 21st century social determinant of health?
Source: PubMed Central journal article supplement — BMJ Open. 2020 Aug 11;10(8):e034967. doi: 10.1136/bmjopen-2019-034967 (PMC7422633; doi:10.1136/bmjopen-2019-034967), 2020-08-11
Supplement: bmjopen-2019-034967.reviewer_comments.pdf [file bmjopen-2019-034967.reviewer_comments.pdf]

## PEER REVIEW HISTORY

BMJ Open publishes all reviews undertaken for accepted manuscripts. Reviewers are asked to complete a checklist review form (<http://bmjopen.bmj.com/site/about/resources/checklist.pdf>) and are provided with free text boxes to elaborate on their assessment. These free text comments are reproduced below.

### ARTICLE DETAILS

|                            |                                                                                                                                                                                                                                            |
|----------------------------|--------------------------------------------------------------------------------------------------------------------------------------------------------------------------------------------------------------------------------------------|
| <b>TITLE (PROVISIONAL)</b> | Consensus Statement - Loneliness in older adults, the 21st Century Social Determinant of Health?                                                                                                                                           |
| <b>AUTHORS</b>             | Prohaska, Thomas; Burholt, Vanessa; Burns, Annette; Golden, Jeannette; Hawkey, Louise; Lawlor, Brian; Leavey, Gerard; Lubben, Jim; O'Sullivan, Roger; Perissinotto, Carla; van Tilburg, Theo; Tully, Mark; Victor, Christina; Fried, Linda |

### VERSION 1 – REVIEW

|                        |                                                               |
|------------------------|---------------------------------------------------------------|
| <b>REVIEWER</b>        | Barbara Weinstein<br>Graduate Center, CUNY<br>NEW YORK<br>USA |
| <b>REVIEW RETURNED</b> | 21-Dec-2019                                                   |

|                         |                                                                                                                                                                                                                                    |
|-------------------------|------------------------------------------------------------------------------------------------------------------------------------------------------------------------------------------------------------------------------------|
| <b>GENERAL COMMENTS</b> | An excellent, succinct and much needed consensus document overviewing the complexities of loneliness and the need for scientists to attend to its prevalence and devastating impacts on health behaviors, well-being and mortality |
|-------------------------|------------------------------------------------------------------------------------------------------------------------------------------------------------------------------------------------------------------------------------|

|                        |                                                              |
|------------------------|--------------------------------------------------------------|
| <b>REVIEWER</b>        | Harm Van Marwijk<br>Brighton and Sussex Medical School<br>UK |
| <b>REVIEW RETURNED</b> | 03-Jan-2020                                                  |

|                         |                                                                                                                                                                                                                                                                                                                                                                                                                                                                                                                                                                                                                                                                                                                                                                                |
|-------------------------|--------------------------------------------------------------------------------------------------------------------------------------------------------------------------------------------------------------------------------------------------------------------------------------------------------------------------------------------------------------------------------------------------------------------------------------------------------------------------------------------------------------------------------------------------------------------------------------------------------------------------------------------------------------------------------------------------------------------------------------------------------------------------------|
| <b>GENERAL COMMENTS</b> | This consensus statement is relatively interesting but there was little in it that was new to me. The reader is perhaps most convinced by the list of expert authors. Not all readers may recognize these, however. It is a specific format, and it is therefore not easy to assess. There is no direct empirical underpinning and many of the comments they make are a bit straightforward or gratuitous even perhaps. The abstract mentions a methods paragraph but I could not find that in the paper. How exactly consensus was reached and whether everyone agreed with what is unclear. I am not sure how this paper would help a new researcher or interested professional. The decision to accept etc is mostly editorial. It seems to reflect a collaborative effort. |
|-------------------------|--------------------------------------------------------------------------------------------------------------------------------------------------------------------------------------------------------------------------------------------------------------------------------------------------------------------------------------------------------------------------------------------------------------------------------------------------------------------------------------------------------------------------------------------------------------------------------------------------------------------------------------------------------------------------------------------------------------------------------------------------------------------------------|

|                        |                                                                                                |
|------------------------|------------------------------------------------------------------------------------------------|
| <b>REVIEWER</b>        | Manfred Beutel<br>Dept. of Psychosomatic Medicine, University Medical Center<br>Mainz, Germany |
| <b>REVIEW RETURNED</b> | Center Mainz, Germany<br>01-Feb-2020                                                           |

|                         |                                                                                                                                 |
|-------------------------|---------------------------------------------------------------------------------------------------------------------------------|
| <b>GENERAL COMMENTS</b> | I encourage publication of a Consensus Statement which serves to promote research into loneliness, its assessment, antecedents, |
|-------------------------|---------------------------------------------------------------------------------------------------------------------------------|

|  |                                                                                                                                                                                                                                                                                                                                                                                                                                                                                                                                                                                                                                                                                                                                                                                                                                                                                                                                                                                                                                                                                                                                                                                                                  |
|--|------------------------------------------------------------------------------------------------------------------------------------------------------------------------------------------------------------------------------------------------------------------------------------------------------------------------------------------------------------------------------------------------------------------------------------------------------------------------------------------------------------------------------------------------------------------------------------------------------------------------------------------------------------------------------------------------------------------------------------------------------------------------------------------------------------------------------------------------------------------------------------------------------------------------------------------------------------------------------------------------------------------------------------------------------------------------------------------------------------------------------------------------------------------------------------------------------------------|
|  | <p>consequences and interventions . However, there are some distinct weaknesses to be taken care of:</p> <p>1) A substantial Proportion of the references is not accessible to the Reader, including conference presentations and unpublished sources such as 18. Thus, the Reader cannot access the data base underlying the Consensus statement. Please make These available (e.g. web links) or leave them out, and substitute by accessible data bases</p> <p>2) while the authors make a good Point about the relevance of loneliness to General health I am still confused about its specific relevance to aging adults. On p 9 the authors state that loneliness is not proportionally increasing in older adults. So why is this particularly important in aging? Increased vulneribility regarding General or mental health, cognitive Deterioration in lonely elderly?</p> <p>3) Among causes (I would prefer antecedents given the lack of knowledge), mental health appears to be neglected, and I find it reductionistic only to consider environmental and social factors excluding Person factors</p> <p>4) I do not understand why the two to three scale have been selected and recommended</p> |
|--|------------------------------------------------------------------------------------------------------------------------------------------------------------------------------------------------------------------------------------------------------------------------------------------------------------------------------------------------------------------------------------------------------------------------------------------------------------------------------------------------------------------------------------------------------------------------------------------------------------------------------------------------------------------------------------------------------------------------------------------------------------------------------------------------------------------------------------------------------------------------------------------------------------------------------------------------------------------------------------------------------------------------------------------------------------------------------------------------------------------------------------------------------------------------------------------------------------------|

|                        |                                                                                                                                                      |
|------------------------|------------------------------------------------------------------------------------------------------------------------------------------------------|
| <b>REVIEWER</b>        | <p>Jose L Ayuso-Mateos<br/>         Department of Psychiatry<br/>         Universidad Autonoma de Madrid<br/>         CIBERSA<br/>         SPAIN</p> |
| <b>REVIEW RETURNED</b> | 11-Feb-2020                                                                                                                                          |

|                         |                                                                                                                                                                                                                                                                                                                                                                                                                                                                                                                                                                                                                                                                                                                                                                                                                                                                                                                                                                                                                                                                                                                                                                                                                                                                                                                                                                              |
|-------------------------|------------------------------------------------------------------------------------------------------------------------------------------------------------------------------------------------------------------------------------------------------------------------------------------------------------------------------------------------------------------------------------------------------------------------------------------------------------------------------------------------------------------------------------------------------------------------------------------------------------------------------------------------------------------------------------------------------------------------------------------------------------------------------------------------------------------------------------------------------------------------------------------------------------------------------------------------------------------------------------------------------------------------------------------------------------------------------------------------------------------------------------------------------------------------------------------------------------------------------------------------------------------------------------------------------------------------------------------------------------------------------|
| <b>GENERAL COMMENTS</b> | <p>The paper present a consensus statement of a meeting that took place in december 2018. The aim of the meeting was to determine the state of the field of loneliness among older people, highlighting best practices, evidence and key research gaps.</p> <p>Author should expand the information concerning the meeting´s participants. Particularly , it is not clear if the group of international experts and policy makers gathered included representatives from low and middle income countries. Although the paper mentions that the meeting gathered international researchers, practitioners and policymakers, it appears that the consensus statement is signed only by academics.</p> <p>All listed authors, with the exception of one expert of the Netherlands, are from English speaking countries and work in high income countries. The authors should specifically mentioned whether the evidence reviewed during the meeting included information and experiences collected outside high income countries and societies. Cultural variations on the experience and consequences of loneliness are not mentioned in the document nor is identified as a research gap.</p> <p>Page 9 mentions the important topic of the assessment of interventions in this area. The issue of outcomes to be considered as part of this assessment is not mentioned</p> |
|-------------------------|------------------------------------------------------------------------------------------------------------------------------------------------------------------------------------------------------------------------------------------------------------------------------------------------------------------------------------------------------------------------------------------------------------------------------------------------------------------------------------------------------------------------------------------------------------------------------------------------------------------------------------------------------------------------------------------------------------------------------------------------------------------------------------------------------------------------------------------------------------------------------------------------------------------------------------------------------------------------------------------------------------------------------------------------------------------------------------------------------------------------------------------------------------------------------------------------------------------------------------------------------------------------------------------------------------------------------------------------------------------------------|

**VERSION 1 – AUTHOR RESPONSE**

|                                                            |
|------------------------------------------------------------|
| <b>Reviewers' comments and summary response and action</b> |
|------------------------------------------------------------|

| Reviewer: 1                                                                                                                                                                                                          | Reviewers'<br>Comments to Author                                                                                                                                                                                                                                                                                              | Response                                                                                                                                                                                                                                                                                                                                                                                                                                        |
|----------------------------------------------------------------------------------------------------------------------------------------------------------------------------------------------------------------------|-------------------------------------------------------------------------------------------------------------------------------------------------------------------------------------------------------------------------------------------------------------------------------------------------------------------------------|-------------------------------------------------------------------------------------------------------------------------------------------------------------------------------------------------------------------------------------------------------------------------------------------------------------------------------------------------------------------------------------------------------------------------------------------------|
| <p>Reviewer Name:<br/>Barbara Weinstein Institution and<br/>Country: Graduate<br/>Center, CUNY, NEW YORK, USA Please state any competing interests or state 'None declared': NA</p>                                  | <p>An excellent, succinct and much needed consensus document overviewing the complexities of loneliness and the need for scientists to attend to its prevalence and devastating impacts on health behaviors, well-being and mortality</p>                                                                                     | <p>We thank the reviewer for this feedback on our consensus document and the need for same.</p>                                                                                                                                                                                                                                                                                                                                                 |
| <p>Reviewer: 2 Reviewer Name:<br/>Harm Van Marwijk<br/>Institution and Country:<br/>Brighton and Sussex Medical School, UK Please state any competing interests or state 'None declared':<br/><br/>None declared</p> | <p>This consensus statement is relatively interesting but there was little in it that was new to me. The reader is perhaps most convinced by the list of expert authors. Not all readers may recognize these, however.</p> <p>The decision to accept etc is mostly editorial. It seems to reflect a collaborative effort.</p> | <p>Our aim was to come together to produce the first ever consensus statement on loneliness which provides an up to date summation of the existing evidence and continuing knowledge gaps. As stated in the paper: "The purpose of this consensus statement is to determine the state of the field of loneliness among older people, highlighting key issues for researchers, policymakers and those designing services and interventions."</p> |

|  |                                                                         |                                                                                                                                                                                                                                                                                                                                                                                                                                                                                                                                                                                                                                                                                                                                                        |
|--|-------------------------------------------------------------------------|--------------------------------------------------------------------------------------------------------------------------------------------------------------------------------------------------------------------------------------------------------------------------------------------------------------------------------------------------------------------------------------------------------------------------------------------------------------------------------------------------------------------------------------------------------------------------------------------------------------------------------------------------------------------------------------------------------------------------------------------------------|
|  | <p>It is a specific format, and it is therefore not easy to assess.</p> | <p>We accept the reviewer's point that a specific format is employed here. However, as this is a consensus statement we argue that this is somewhat unavoidable and is also in line with previous consensus statements on other topics (Bangsbo et al. 2016) (Morley et al. 2013)</p> <p>We have, however, in the interests of increased clarity added a methods section to the main text to illustrate the process in terms of reaching this consensus.</p> <p>We opted to submit this statement as a 'Communication' as it does not fit under the category of original research and relevant headings and instead was considered appropriate to this format which BMJ Open describe as</p> <p>'rather than presenting primary research, it is an</p> |
|--|-------------------------------------------------------------------------|--------------------------------------------------------------------------------------------------------------------------------------------------------------------------------------------------------------------------------------------------------------------------------------------------------------------------------------------------------------------------------------------------------------------------------------------------------------------------------------------------------------------------------------------------------------------------------------------------------------------------------------------------------------------------------------------------------------------------------------------------------|

|  |                                                                                                                                           |                                                                                                                                                                                                                                                                                                                                                                                                                                      |
|--|-------------------------------------------------------------------------------------------------------------------------------------------|--------------------------------------------------------------------------------------------------------------------------------------------------------------------------------------------------------------------------------------------------------------------------------------------------------------------------------------------------------------------------------------------------------------------------------------|
|  |                                                                                                                                           | <p>opportunity to present ideas, examples, and innovations relating to the conduct of clinical research.'</p>                                                                                                                                                                                                                                                                                                                        |
|  | <p>There is no direct empirical underpinning and many of the comments they make are a bit straightforward or gratuitous even perhaps.</p> | <p>The aim of this consensus statement was to provide a high-level summary with evidence cited.</p> <p>While we agree many of the points maybe known to some, there is a lot of continued misinformation and conflation around this important topic that needs clarification.</p> <p>Furthermore, this communication is directed not solely at academics new to this area but also at HCPs, policy makers, service planners, the</p> |

|  |                                                                                             |                                                                                                                                                                                                                                                                                                                                                                                                                                                                                                                                    |
|--|---------------------------------------------------------------------------------------------|------------------------------------------------------------------------------------------------------------------------------------------------------------------------------------------------------------------------------------------------------------------------------------------------------------------------------------------------------------------------------------------------------------------------------------------------------------------------------------------------------------------------------------|
|  |                                                                                             | <p>voluntary and community sector and a wider public audience including media who we would also seek to engage further with press releases upon publication.</p>                                                                                                                                                                                                                                                                                                                                                                   |
|  | <p>The abstract mentions a methods paragraph but I could not find that in the paper.</p>    | <p>We have now added a methods section to the paper and thank the reviewer for pointing this out and providing the opportunity to improve the statement in this way.</p>                                                                                                                                                                                                                                                                                                                                                           |
|  | <p>How exactly consensus was reached and whether everyone agreed with what is unclear.</p>  | <p>We have now added a methods section to the paper which describes this and thank the reviewer for pointing this out and providing the opportunity to improve the statement in this way.</p>                                                                                                                                                                                                                                                                                                                                      |
|  | <p>I am not sure how this paper would help a new researcher or interested professional.</p> | <p>This paper provides a summary of the state of the field of loneliness among older people, highlighting key issues for researchers, policymakers and those designing services and interventions as well as directions for moving forward in an informed and scientific way.</p> <p>For professionals, we feel this statement helps by outlining in one brief document the difference between loneliness and isolation, a definition, types of loneliness and associations and the current lack of evidence on interventions.</p> |

|                                                                                                                                                                                                            |                                                                                                                                                                                                 |                                                                                                                                                                                                                                  |
|------------------------------------------------------------------------------------------------------------------------------------------------------------------------------------------------------------|-------------------------------------------------------------------------------------------------------------------------------------------------------------------------------------------------|----------------------------------------------------------------------------------------------------------------------------------------------------------------------------------------------------------------------------------|
| <p>Reviewer: 3 Reviewer Name:<br/>Manfred Beutel</p> <p>Institution and<br/>Country: Dept. of<br/>Psychosomatic<br/>Medicine, University<br/>Medical Center<br/>Mainz, Germany</p> <p>Please state any</p> | <p>I encourage<br/>publication of a Consensus<br/>Statement which serves to<br/>promote research into<br/>loneliness, its assessment,<br/>antecedents, consequences<br/>and interventions .</p> | <p>We thank the reviewer for their<br/>support of the publication of a<br/>consensus statement on this topic<br/>and for their below recommendations<br/>which have allowed us to strengthen<br/>and improve this statement.</p> |
|------------------------------------------------------------------------------------------------------------------------------------------------------------------------------------------------------------|-------------------------------------------------------------------------------------------------------------------------------------------------------------------------------------------------|----------------------------------------------------------------------------------------------------------------------------------------------------------------------------------------------------------------------------------|

|                                                                            |                                                                                                                                                                                                                                                                                                                                                                                                |                                                                                                                                                        |
|----------------------------------------------------------------------------|------------------------------------------------------------------------------------------------------------------------------------------------------------------------------------------------------------------------------------------------------------------------------------------------------------------------------------------------------------------------------------------------|--------------------------------------------------------------------------------------------------------------------------------------------------------|
| <p>competing interests or state<br/>'None declared': None<br/>declared</p> | <p>However, there are some distinct<br/>weaknesses to be taken care of:</p>                                                                                                                                                                                                                                                                                                                    |                                                                                                                                                        |
|                                                                            | <p>A substantial Proportion of the<br/>references is not accessible to<br/>the Reader, including<br/>conference presentations and<br/>unpublished sources such as 18.<br/>Thus, the Reader cannot access<br/>the data base underlying the<br/>Consensus statement. Please<br/>make These available (e.g. web<br/>links) or leave them out, and<br/>substitute by accessible data<br/>bases</p> | <p>We thank the reviewer for pointing<br/>out this omission and have now<br/>included the link to online location<br/>for all presentations cited.</p> |

|  |                                                                                                                                                                                                                                                                                                                                                                                                                   |                                                                                                                                                                                                                                                                                                                                                                                                                                                                                                                                                                                                                                                                                                                                                                                                                                                                                                                                                                                                                                                                                                                                                               |
|--|-------------------------------------------------------------------------------------------------------------------------------------------------------------------------------------------------------------------------------------------------------------------------------------------------------------------------------------------------------------------------------------------------------------------|---------------------------------------------------------------------------------------------------------------------------------------------------------------------------------------------------------------------------------------------------------------------------------------------------------------------------------------------------------------------------------------------------------------------------------------------------------------------------------------------------------------------------------------------------------------------------------------------------------------------------------------------------------------------------------------------------------------------------------------------------------------------------------------------------------------------------------------------------------------------------------------------------------------------------------------------------------------------------------------------------------------------------------------------------------------------------------------------------------------------------------------------------------------|
|  | <p>while the authors make a good Point about the relevance of loneliness to General health I am still confused about its specific relevance to aging adults. On p 9 the authors state that loneliness is not proportionally increasing in older adults. So why is this particularly important in aging? Increased vulnerabilty regarding General or mental health, cognitive Deterioration in lonely elderly?</p> | <p>We appreciate the reviewer's point and wish to emphasize, as stated in our statement, that we recognise that loneliness occurs across the lifecycle and indeed the importance of more research in relation to groups such as young adults. As we have stated:</p> <p>“the majority of older adults are not chronically lonely and evidence indicates that loneliness is also experienced by other age groups, especially young adults where levels are even higher than in older adults [19]” “Future research is needed to help expand our understanding of loneliness, antecedents and consequences across the life course and in different groups such as young people...”</p> <p>However, the fact that the vast majority of research and publications on loneliness to date have focused on older adults also means that it is about this group which we can currently draw some conclusions in relation to existing knowledge, while also highlighting the significant persisting knowledge gaps.</p> <p>In addition to this the vast majority of the authors listed are gerontologists and so best equipped to speak in relation to this group.</p> |
|--|-------------------------------------------------------------------------------------------------------------------------------------------------------------------------------------------------------------------------------------------------------------------------------------------------------------------------------------------------------------------------------------------------------------------|---------------------------------------------------------------------------------------------------------------------------------------------------------------------------------------------------------------------------------------------------------------------------------------------------------------------------------------------------------------------------------------------------------------------------------------------------------------------------------------------------------------------------------------------------------------------------------------------------------------------------------------------------------------------------------------------------------------------------------------------------------------------------------------------------------------------------------------------------------------------------------------------------------------------------------------------------------------------------------------------------------------------------------------------------------------------------------------------------------------------------------------------------------------|

|  |  |                                                                                                                       |
|--|--|-----------------------------------------------------------------------------------------------------------------------|
|  |  | <p>Finally, issues such as the growing older population globally also provide a further rationale for a consensus</p> |
|--|--|-----------------------------------------------------------------------------------------------------------------------|

|  |                                                                                                                                                                                                                              |                                                                                                                                                                                                                                                                                                                                                                                                                                                                                                                                                                                                                                                                                                                                                 |
|--|------------------------------------------------------------------------------------------------------------------------------------------------------------------------------------------------------------------------------|-------------------------------------------------------------------------------------------------------------------------------------------------------------------------------------------------------------------------------------------------------------------------------------------------------------------------------------------------------------------------------------------------------------------------------------------------------------------------------------------------------------------------------------------------------------------------------------------------------------------------------------------------------------------------------------------------------------------------------------------------|
|  |                                                                                                                                                                                                                              | statement on loneliness in older adults specifically.                                                                                                                                                                                                                                                                                                                                                                                                                                                                                                                                                                                                                                                                                           |
|  | <p>Among causes (I would prefer antecedents given the lack of knowledge), mental health appears to be neglected, and I find it reductionistic only to consider environmental and social factors excluding Person factors</p> | <p>We accept the reviewer's point here and have changed wording to use antecedent instead of cause throughout.</p> <p>In relation to mental health, we have now edited the statement to acknowledge associations with mental health more broadly in addition to the point we make regarding the particularly strong evidence for depression.</p> <p>We also acknowledge the focus on environmental and social factors over personal in this statement and have now acknowledged this focus in the text too: "Personal level characteristics (e.g. gender, marital status, socio-economic status) are often included as antecedents to loneliness in research, but there is less focus on the role of environmental and structural factors."</p> |
|  | <p>I do not understand why the two to three scale have been selected and recommended</p>                                                                                                                                     | <p>These scales have been selected and recommended because, as stated in the statement, they are the most widely used validated scales in relation to loneliness.</p> <p>We do however acknowledge that these scales have been developed in HIC/individualistic cultures and therefore may not be as relevant in different cultures and we have now added this reflection to the statement in the section on measurement:</p>                                                                                                                                                                                                                                                                                                                   |



|                                                                                                                                                                                                                                                                                                        |                                                                                                                                                                                                                                                                     |                                                                                                                                                                                                                                     |
|--------------------------------------------------------------------------------------------------------------------------------------------------------------------------------------------------------------------------------------------------------------------------------------------------------|---------------------------------------------------------------------------------------------------------------------------------------------------------------------------------------------------------------------------------------------------------------------|-------------------------------------------------------------------------------------------------------------------------------------------------------------------------------------------------------------------------------------|
|                                                                                                                                                                                                                                                                                                        |                                                                                                                                                                                                                                                                     | <p>“It is also recognised that these scales have been developed in HIC/individualistic cultures and thus require validation in LMIC and collectivist cultures, where they may be not be as relevant or capture all dimensions.”</p> |
| <p>Reviewer: 4 Reviewer Name:<br/>Jose L Ayuso-Mateos<br/>Institution and Country:<br/><br/>Department of<br/><br/>Psychiatry,<br/><br/>Universidad<br/><br/>Autonoma de<br/><br/>Madrid, CIBERSA, SPAIN<br/>Please state any competing interests or state ‘None declared’:<br/><br/>None declared</p> | <p>The paper present a consensus statement of a meeting that took place in December 2018. The aim of the meeting was to determine the state<br/><br/>of the field of loneliness among older people, highlighting best practices, evidence and key research gaps</p> |                                                                                                                                                                                                                                     |

|  |                                                                                                                                                                                                                                                            |                                                                                                                                                                                                                                                                                                                                                                                                                                                                                                                                             |
|--|------------------------------------------------------------------------------------------------------------------------------------------------------------------------------------------------------------------------------------------------------------|---------------------------------------------------------------------------------------------------------------------------------------------------------------------------------------------------------------------------------------------------------------------------------------------------------------------------------------------------------------------------------------------------------------------------------------------------------------------------------------------------------------------------------------------|
|  | <p>Author should expand the information concerning the meeting’s participants.<br/><br/>Particularly , it is not clear if the group of international experts and policy makers gathered included representatives from low and middle income countries.</p> | <p>We acknowledge as a limitation that this event and resultant statement was limited to representatives from high income countries only and thank the reviewer for rightly pointing out the need to highlight this limitation which we have now added to the statement:<br/><br/>“This statement is limited by its lack of data or representatives from LMICs and also by its broad focus on English speaking countries with only one author from a country where English is not the first language represented (the Netherlands). The</p> |
|--|------------------------------------------------------------------------------------------------------------------------------------------------------------------------------------------------------------------------------------------------------------|---------------------------------------------------------------------------------------------------------------------------------------------------------------------------------------------------------------------------------------------------------------------------------------------------------------------------------------------------------------------------------------------------------------------------------------------------------------------------------------------------------------------------------------------|

|  |                                                                                                                                                                                              |                                                                                                                                                                                                                                                                                                                                                                                                                                                                                                                                                                                                                                                                                                     |
|--|----------------------------------------------------------------------------------------------------------------------------------------------------------------------------------------------|-----------------------------------------------------------------------------------------------------------------------------------------------------------------------------------------------------------------------------------------------------------------------------------------------------------------------------------------------------------------------------------------------------------------------------------------------------------------------------------------------------------------------------------------------------------------------------------------------------------------------------------------------------------------------------------------------------|
|  |                                                                                                                                                                                              | <p>representatives of this group have however worked in LMICs and with ethnic minority groups from these countries. As a group, we acknowledge the lack of research from LMICs on prevalence, pathways, and cultural differences in measurement.”</p>                                                                                                                                                                                                                                                                                                                                                                                                                                               |
|  | <p>Although the paper mentions that the meeting gathered international researchers, practitioners and policymakers, it appears that the consensus statement is signed only by academics.</p> | <p>This consensus statement has been written by the signed authors not by all those that attended the event. Practitioners and policymakers however also presented at the event and thus have informed the paper and these presentations are cited with links to online presentations also provided in the reference section.</p> <p>We have also now added an acknowledgement section to this statement to formally thank these contributors:</p> <p>“Acknowledgements</p> <p>We would like to thank all the contributors (practitioners, policymakers and researchers) to the symposium, for both their presentations and for the insightful discussion that took place over the three days.”</p> |

|  |                                                                                                                                                                                                                                                                                                                      |                                                                                                                                                                                                                                                                                                                                                                                                                                                                                                                                                                                                                                                                                                                                                                                                                                         |
|--|----------------------------------------------------------------------------------------------------------------------------------------------------------------------------------------------------------------------------------------------------------------------------------------------------------------------|-----------------------------------------------------------------------------------------------------------------------------------------------------------------------------------------------------------------------------------------------------------------------------------------------------------------------------------------------------------------------------------------------------------------------------------------------------------------------------------------------------------------------------------------------------------------------------------------------------------------------------------------------------------------------------------------------------------------------------------------------------------------------------------------------------------------------------------------|
|  | <p>All listed authors, with the exception of one expert of the Netherlands, are from English speaking countries and work in high income countries. The authors should specifically mentioned whether the evidence reviewed during the meeting included information and experiences collected outside high income</p> | <p>We acknowledge as a limitation that this event and resultant statement was limited to representatives from high income and largely English speaking countries and thank the reviewer for rightly pointing out the need to highlight this limitation.</p> <p>As above we have added this under limitations:</p> <p>“This statement is limited by its lack of data or representatives from LMICs countries and also by its broad focus on English speaking countries with only one author from a country where English is not the first language represented (the Netherlands). The representatives of this group have however worked in LMICs and with ethnic minority groups from these countries. As a group, we acknowledge the lack of research from LMICs on prevalence, pathways, and cultural differences in measurement.”</p> |
|--|----------------------------------------------------------------------------------------------------------------------------------------------------------------------------------------------------------------------------------------------------------------------------------------------------------------------|-----------------------------------------------------------------------------------------------------------------------------------------------------------------------------------------------------------------------------------------------------------------------------------------------------------------------------------------------------------------------------------------------------------------------------------------------------------------------------------------------------------------------------------------------------------------------------------------------------------------------------------------------------------------------------------------------------------------------------------------------------------------------------------------------------------------------------------------|

|  |                          |  |
|--|--------------------------|--|
|  | countries and societies. |  |
|--|--------------------------|--|

|  |                                                                                                                                                    |                                                                                                                                                                                                                                                                                                                                                                                                                                                                                                                                                                                                                                                                                                                                                                                                                                                                                                                                                                                                                                                                                                                                                                                                                                                                                                                                                                                                              |
|--|----------------------------------------------------------------------------------------------------------------------------------------------------|--------------------------------------------------------------------------------------------------------------------------------------------------------------------------------------------------------------------------------------------------------------------------------------------------------------------------------------------------------------------------------------------------------------------------------------------------------------------------------------------------------------------------------------------------------------------------------------------------------------------------------------------------------------------------------------------------------------------------------------------------------------------------------------------------------------------------------------------------------------------------------------------------------------------------------------------------------------------------------------------------------------------------------------------------------------------------------------------------------------------------------------------------------------------------------------------------------------------------------------------------------------------------------------------------------------------------------------------------------------------------------------------------------------|
|  | <p>Cultural variations on the experience and consequences of loneliness are not mentioned in the document nor is identified as a research gap.</p> | <p>We have added to the statement to ref</p> <p>Should we add this as a further limitation?</p> <p>Important cultural differences or variations are mentioned in the statement under ‘A way forward’:</p> <p>“Future research is needed to help expand our understanding of loneliness, antecedents and consequences across the life course and in different groups such as young people, migrants, LGBT, and other minority groups <u>as well as country/cultural differences</u> and diverse health domains including the impact of enduring long term loneliness.”</p> <p>We have also added some further detail near the beginning of the statement to help set the scene in relation to differences between high versus low and middle income countries:</p> <p>“With growing concern about rates and consequences of loneliness in civic society, there is also an increasing body of research on loneliness and social isolation among older adults especially in high income countries (HICs). However, there are significant gaps in our understanding of the ‘true rates’ of loneliness within and across countries, the drivers of loneliness in different populations and sub-groups, its impact on health and well-being, and a lack of high quality evidence on effective solutions. In low- and middle-income countries (LMICs), research to underpin the allocation of resources to meet</p> |
|--|----------------------------------------------------------------------------------------------------------------------------------------------------|--------------------------------------------------------------------------------------------------------------------------------------------------------------------------------------------------------------------------------------------------------------------------------------------------------------------------------------------------------------------------------------------------------------------------------------------------------------------------------------------------------------------------------------------------------------------------------------------------------------------------------------------------------------------------------------------------------------------------------------------------------------------------------------------------------------------------------------------------------------------------------------------------------------------------------------------------------------------------------------------------------------------------------------------------------------------------------------------------------------------------------------------------------------------------------------------------------------------------------------------------------------------------------------------------------------------------------------------------------------------------------------------------------------|

|  |  |                                                                                                                                                                                                                                                                                                                                                                                                                                                                                                                                                                                                                                                                                                                                                                            |
|--|--|----------------------------------------------------------------------------------------------------------------------------------------------------------------------------------------------------------------------------------------------------------------------------------------------------------------------------------------------------------------------------------------------------------------------------------------------------------------------------------------------------------------------------------------------------------------------------------------------------------------------------------------------------------------------------------------------------------------------------------------------------------------------------|
|  |  | <p>medical needs, and/or to secure adequate food and housing in later life has been given greater priority than studies on loneliness ”</p> <p>As well as mentioned this lack of data as a limitations again at the end of the statement:</p> <p>“This statement is limited by its lack of data or representatives from LMICs countries and also by its broad focus on English speaking countries with only one author from a country where English is not the first language represented (the Netherlands). The</p> <p>representatives of this group have however worked in LMICs and with ethnic minority groups from these countries. As a group, we acknowledge the lack of research from LMICs on prevalence, pathways, and cultural differences in measurement.”</p> |
|--|--|----------------------------------------------------------------------------------------------------------------------------------------------------------------------------------------------------------------------------------------------------------------------------------------------------------------------------------------------------------------------------------------------------------------------------------------------------------------------------------------------------------------------------------------------------------------------------------------------------------------------------------------------------------------------------------------------------------------------------------------------------------------------------|

|  |                                                                                                                                                                                       |                                                                                                                                                                                                                                                                                                                                                                                                                                                                                                                                                                                             |
|--|---------------------------------------------------------------------------------------------------------------------------------------------------------------------------------------|---------------------------------------------------------------------------------------------------------------------------------------------------------------------------------------------------------------------------------------------------------------------------------------------------------------------------------------------------------------------------------------------------------------------------------------------------------------------------------------------------------------------------------------------------------------------------------------------|
|  | <p>Page 9 mentions the important topic of the assessment of interventions in this area. The issue of outcomes to be considered as part of this assessment is</p> <p>not mentioned</p> | <p>We acknowledge the reviewers point and have now linked back to the validated widely used scales in this section as well as pointed out the need for further outcomes to be assessed in an established way adding the below:</p> <p>“While we recommend appropriate use of the validated widely used measures described above we also acknowledge that minimal attention has been directed toward determining the optimal intensity, duration and frequency of the therapeutic elements of loneliness interventions and further validated established outcomes are therefore needed.”</p> |
|--|---------------------------------------------------------------------------------------------------------------------------------------------------------------------------------------|---------------------------------------------------------------------------------------------------------------------------------------------------------------------------------------------------------------------------------------------------------------------------------------------------------------------------------------------------------------------------------------------------------------------------------------------------------------------------------------------------------------------------------------------------------------------------------------------|

## References

- Bangsbo J et al. (2016) The Copenhagen Consensus Conference 2016: children, youth, and physical activity in schools and during leisure time *Br J Sports Med* 50:1177-1178
- Morley JE et al. (2013) Frailty consensus: a call to action *Journal of the American Medical Directors Association* 14:392-397
